# Supplementary material for: The Effect of Indoor Daylight Levels on Patients Admitted to General Surgery
Source: Research Square preprint supplement (doi:10.21203/rs.3.rs-111178/v1), 2020-11-20
Supplement: Supplementary file 1 [file 1102d775ddfc62380813fc33.xlsx]

## Sheet: TableS1
Table S1	Light intensity by light sides of the hospital unit across daylight hours in two sky conditions.
Time	Sunny Day			Overcast Day
	Low Light Side	High Light Side		Low Light Side	High Light Side
06:00:00	18	195.2		5.8	189
07:00:00	28.2	477.8		6.2	282
08:00:00	37.4	605.8		8.2	335.2
09:00:00	44	723.6		11.4	376.4
10:00:00	52.4	851		14.4	414.2
11:00:00	68.6	1143.6		18.2	541.6
12:00:00	82	1553		25.2	590.8
13:00:00	79	1432		18	468.8
14:00:00	60.4	1355.2		13.4	346.6
15:00:00	22.4	819.2		7.8	170.4
16:00:00	14	493.2		4.2	56.6
17:00:00	6.6	152.6		3.2	55.6
18:00:00	2.8	38		2.4	28
Mean ± SD	39.7 ± 28.2	756.9 ± 489.1		10.7 ± 7.1	296.6 ± 183.8
T-test p value	<0.001			<0.001

## Sheet: TableS2
Table S2	Total costs of patients by light sides of the hospital units across 616 plural subgroups.
Subgroups		Low Light Side			High Light Side		p-value
		N	median (Q1-Q3)		N	median (Q1-Q3)
Sex=1	Age1	170	12936.5 (7863.0-24091.3)		180	12810.0 (7518.0-22122.0)	0.898
	Age2	194	14352.8 (7763.0-24415.4)		202	15052.0 (8320.0-22707.0)	0.1749
	Age3	257	13703.1 (7362.6-21366.9)		262	13837.0 (8372.0-22807.0)	0.2264
	Age4	268	15999.4 (9052.2-31945.5)		229	15692.0 (7833.0-36421.0)	0.5982
Sex=2	Age1	171	13284.6 (8221.7-21453.9)		178	12532.0 (7870.0-17484.0)	0.1166
	Age2	164	13813.6 (7479.3-24263.7)		159	12493.0 (6807.0-19055.0)	0.1473
	Age3	108	13329.7 (6985.1-20742.2)		114	14799.0 (7704.0-29168.0)	0.2034
	Age4	146	17493.1 (7552.7-53249.8)		154	13497.0 (7687.0-31012.0)	0.1548
Sex=1	BMI1	92	11719.0 (6199.2-16773.2)		109	11818.0 (7322.0-26785.0)	0.08371
	BMI2	608	14603.0 (7911.9-25481.6)		561	13956.0 (7833.0-22330.0)	0.4159
	BMI3	162	16096.0 (8256.2-26221.1)		168	16321.0 (9946.0-32916.0)	0.8129
	BMI4	27	18186.6 (9065.5-25267.3)		35	19992.0 (8303.0-29643.0)	0.4613
Sex=2	BMI1	116	12426.6 (6204.5-23107.2)		130	10097.0 (5677.0-16759.0)	0.2003
	BMI2	359	13788.4 (7885.2-28322.8)		357	13322.0 (7814.0-22079.0)	0.3614
	BMI3	93	15244.1 (9154.2-26461.9)		95	14711.0 (8454.0-23170.0)	0.881
	BMI4	21	18620.3 (13593.2-25772.5)		23	16116.0 (10024.0-29898.0)	0.9646
Sex=1	LOS1	480	9619.0 (5586.6-14703.7)		455	9542.0 (5758.0-14150.0)	0.9193
	LOS2	223	17702.4 (12222.9-25791.3)		220	16437.0 (11904.0-24182.0)	0.2799
	LOS3	147	42878.7 (27202.3-58374.6)		161	44005.0 (31907.0-59771.0)	0.5903
	LOS4	39	78086.6 (61814.4-107337.5)		37	83964.0 (64887.0-100000.0)	0.9542
Sex=2	LOS1	273	8333.2 (4477.3-13446.8)		298	8521.0 (4689.0-12994.0)	0.4249
	LOS2	163	14980.1 (11216.4-20346.5)		185	14821.0 (10225.0-20110.0)	0.6932
	LOS3	114	39999.7 (28147.4-55754.6)		100	38949.0 (27965.0-58728.0)	0.9181
	LOS4	39	90737.8 (71629.9-121204.2)		22	83859.0 (61907.0-100000.0)	0.7768
Sex=1	Surgery0	182	12103.3 (6081.2-18162.9)		185	10756.0 (6927.0-16695.0)	0.2984
	Surgery1	707	14934.4 (8511.7-27630.5)		688	15338.0 (8673.0-30893.0)	0.7228
Sex=2	Surgery0	87	12211.3 (4814.8-19853.3)		99	9641.0 (5205.0-16223.0)	0.1299
	Surgery1	502	14073.2 (7788.7-30076.3)		506	13583.0 (8024.0-24029.0)	0.1661
Sex=1	Diagnosis1	624	14185.1 (7751.8-22190.2)		623	14567.0 (8140.0-26100.0)	0.3148
	Diagnosis2	40	14100.6 (6616.9-23614.8)		38	11627.0 (5753.0-24472.0)	0.3449
	Diagnosis3	117	14844.5 (10102.9-27057.7)		107	14044.0 (9427.0-23200.0)	0.1961
	Diagnosis4	20	14692.1 (12427.9-16245.8)		20	13801.0 (12096.0-16398.0)	0.9571
	Diagnosis5	31	15658.5 (7110.4-28481.1)		27	14447.0 (5836.0-28554.0)	0.5598
	Diagnosis6	57	18476.9 (7082.6-36105.7)		58	15399.0 (6642.0-30729.0)	0.1521
Sex=2	Diagnosis1	331	13783.8 (6949.3-31039.3)		353	13196.0 (7682.0-20868.0)	0.4414
	Diagnosis2	59	12046.5 (7705.0-26836.3)		60	9505.0 (5902.0-19390.0)	0.5644
	Diagnosis3	127	13454.9 (10293.8-18916.7)		132	13677.0 (8312.0-20878.0)	0.5418
	Diagnosis4	10	15462.7 (11414.2-23701.3)		5	19212.0 (12230.0-49538.0)	0.2879
	Diagnosis5	31	25423.3 (10263.1-41685.7)		28	18995.0 (11381.0-39488.0)	0.8344
	Diagnosis6	31	21002.9 (12567.4-34697.5)		27	8733.0 (5162.0-20660.0)	0.2828
Sex=1	Hypertension0	584	13951.5 (7361.4-24344.3)		563	13828.3 (8042.5-24016.9)	0.5661
	Hypertension1	305	15145.3 (9218.2-25066.7)		310	16012.6 (8248.1-27641.3)	0.4096
Sex=2	Hypertension0	423	13471.3 (7062.1-26231.2)		441	12643.1 (7377.0-19205.3)	0.1595
	Hypertension1	166	15431.9 (8643.5-31040.0)		164	14524.6 (8397.8-30780.4)	0.2615
Sex=1	Diabetes0	752	14252.4 (7804.6-24050.2)		756	14307.9 (8252.2-24438.6)	0.7177
	Diabetes1	137	14856.0 (7906.2-25781.5)		117	14446.6 (7211.2-29961.2)	0.8896
Sex=2	Diabetes0	529	13788.4 (7234.2-27504.0)		546	13035.4 (7529.1-20756.3)	0.1059
	Diabetes1	60	14788.1 (9202.2-24283.1)		59	13227.8 (8325.6-34015.9)	0.58
Sex=1	Smoking0	320	14535.0 (7557.7-26035.8)		322	15397.6 (8456.9-26121.2)	0.7982
	Smoking1	569	14371.9 (7962.4-24007.1)		551	13649.3 (7969.3-25554.9)	0.8012
Sex=2	Smoking0	580	13959.8 (7430.1-27510.3)		601	13049.5 (7606.7-21425.8)	0.07038
	Smoking1	9	11521.4 (8030.3-19764.0)		4	10749.6 (6446.1-24132.5)	0.82
Sex=1	Drinking0	368	13841.3 (6822.8-21299.5)		371	14997.2 (8086.2-27533.7)	0.1991
	Drinking1	521	14844.5 (8900.7-27609.7)		502	13926.2 (8132.3-25390.9)	0.3939
Sex=2	Drinking0	549	13835.5 (7164.5-26978.5)		558	12939.6 (7529.2-20756.3)	0.1516
	Drinking1	40	15574.9 (11516.6-41342.8)		47	15158.3 (9195.5-30571.1)	0.1636
Sex=1	District0	305	13330.9 (6980.0-24441.4)		256	12704 .0(6628.0-22381.0)	0.4344
	District1	584	14766.2 (8500.2-24891.1)		617	15112.0 (8879.0-27009.0)	0.5967
Sex=2	District0	204	14202.2 (7499.4-30021.5)		196	12038.0 (6484.0-19636.0)	0.02884
	District1	385	13788.4 (7399.0-26461.9)		409	13322.0 (7804.0-21993.0)	0.3214
Sex=1	Education1	41	14827.2 (8126.2-51336.8)		36	13950.0 (6944.0-23049.0)	0.2278
	Education2	319	14394.4 (7867.9-21975.5)		254	13582.0 (8037.0-22797.0)	0.454
	Education3	278	14766.2 (7814.7-25735.2)		314	14504.0 (7541.0-26057.0)	0.4089
	Education4	135	14866.9 (7356.5-21742.0)		148	16548.0 (10496.0-28546.0)	0.1215
	Education5	116	13232.4 (9281.0-25800.3)		121	13956.0 (9122.0-25436.0)	0.9097
Sex=2	Education1	90	15227.2 (7821.6-45559.4)		78	12094.0 (6831.0-29387.0)	0.04327
	Education2	190	13985.3 (7146.9-29431.4)		201	14497.0 (7680.0-22399.0)	0.985
	Education3	148	13565.3 (7108.0-19892.8)		168	12422.0 (6029.0-18195.0)	0.2659
	Education4	84	14652.0 (9916.5-25772.9)		86	13904.0 (8392.0-20417.0)	0.2392
	Education5	77	13247.5 (7955.8-29994.1)		72	13296.0 (8160.0-19884.0)	0.9702
Age=1	BMI1	48	10603.7 (6383.1-14978.9)		67	10749.0 (7567.0-18345.0)	0.6889
	BMI2	207	12836.0 (7990.2-22767.2)		223	12812.0 (7919.0-18291.0)	0.2775
	BMI3	72	15764.5 (10225.0-25906.7)		51	13510.0 (9480.0-24689.0)	0.7945
	BMI4	14	12943.4 (9270.2-18879.5)		17	13590.0 (5745.0-16818.0)	0.847
Age=2	BMI1	55	12973.1 (6089.5-17718.6)		53	9448.0 (5421.0-15400.0)	0.1872
	BMI2	221	14462.9 (8057.3-25911.8)		214	13537.0 (7524.0-19334.0)	0.0664
	BMI3	62	12803.7 (6922.9-23208.5)		76	16127.0 (8634.0-24902.0)	0.7283
	BMI4	20	18532.8 (10904.2-25098.6)		18	19954.0 (13099.0-42648.0)	0.8167
Age=3	BMI1	41	9665.5 (5998.1-19108.2)		59	11526.0 (6790.0-16580.0)	0.4666
	BMI2	259	13303.9 (7313.9-20961.3)		225	14431.0 (8231.0-21870.0)	0.3536
	BMI3	60	14650.8 (9697.4-19700.8)		75	15408.0 (9859.0-33263.0)	0.3335
	BMI4	5	38985.1 (19177.3-62106.0)		17	27635.0 (11841.0-37541.0)	0.7601
Age=4	BMI1	64	14009.9 (6737.9-21967.2)		60	12138.0 (5648.0-27709.0)	0.4216
	BMI2	280	16066.4 (8881.7-39229.7)		256	15128.0 (7801.0-35501.0)	0.7195
	BMI3	61	21165.1 (13845.6-39497.3)		61	16279.0 (8973.0-37428.0)	0.7474
	BMI4	9	20336.4 (13733.8-25660.6)		6	16529.0 (9026.0-28029.0)	0.7475
Age=1	LOS1	180	10020.4 (4862.9-13727.6)		198	9976.0 (5887.8-13354.7)	0.9027
	LOS2	99	14844.5 (11077.1-25240.1)		101	14558.9 (10998-20343.1)	0.5375
	LOS3	47	34990.6 (26625.4-47449.4)		47	39018.7 (29010.9-55885)	0.9521
	LOS4	15	70521.8 (54729.5-96981.9)		12	72082.7 (47931.1-78334.5)	0.392
Age=2	LOS1	176	8174.6 (5423.2-13731.6)		201	8881.4 (5579.7-13912.0)	0.2969
	LOS2	103	15570.7 (11467.3-23160.5)		98	16391.1 (13048.1-22710.3)	0.6107
	LOS3	59	42185.1 (25383.6-60091.6)		52	42019.5 (30139.1-56943.6)	0.5385
	LOS4	20	84348.6 (58637.7-123455.5)		10	82758.3 (61599.3-145448.5)	0.5578
Age=3	LOS1	212	9067.0 (5219.6-14374.3)		198	10042.4 (5943.5-14519.2)	0.234
	LOS2	86	16847.7 (11473.0-23975.6)		90	15639.0 (10201.1-22382.3)	0.4442
	LOS3	54	39462.7 (27567.3-54437.7)		70	44920.7 (30642.5-56625.6)	0.9643
	LOS4	13	71252.1 (67034.5-104863.3)		18	81976.3 (75112.8-117689.2)	0.2991
Age=4	LOS1	185	8910.6 (5420.9-14344.7)		156	7533.3 (4763.9-13113.2)	0.1211
	LOS2	98	17496.8 (12797.4-24474.9)		116	15315.4 (10329.8-24077)	0.5567
	LOS3	101	43948.3 (30818.6-59036.1)		92	46666.9 (29927.6-66058.1)	0.5884
	LOS4	30	92204.7 (75444.7-120517.5)		19	95752.0 (75002.0-133668.0)	0.7849
Age=1	Surgery0	56	7092.7 (2896.1-17955.3)		58	10801.0 (5410.0-16195.0)	0.4522
	Surgery1	285	13471.3 (9509.9-24441.4)		300	12956.0 (8455.0-20386.0)	0.3807
Age=2	Surgery0	56	11752.9 (6325.0-15753.9)		65	10998.0 (6139.0-17118.0)	0.9957
	Surgery1	302	14447.9 (7764.2-27513.2)		296	14077.0 (7909.0-22637.0)	0.5714
Age=3	Surgery0	61	10308.3 (6211.4-16045.6)		75	10633.0 (6772.0-16455.0)	0.8194
	Surgery1	304	14388.0 (7355.3-22930.7)		301	15158.0 (8620.0-30147.0)	0.04725
Age=4	Surgery0	96	14283.8 (6544.1-20927.8)		86	9514.0 (6056.0-17168.0)	0.05115
	Surgery1	318	16945.5 (9525.8-42801.0)		297	16616.0 (8401.0-41146.0)	0.7614
Age=1	Diagnosis1	165	13471.3 (8741.8-20715.8)		201	13304.0 (8453.0-19589.0)	0.2878
	Diagnosis2	34	10697.4 (4955.9-26457.2)		24	8648.0 (4403.0-15772.0)	0.1577
	Diagnosis3	100	12369.7 (9512.4-17702.9)		77	12455.0 (8057.0-14821.0)	0.8993
	Diagnosis4	5	10112.9 (5351.9-10503.3)		6	11915.0 (9954.0-14906.0)	0.2158
	Diagnosis5	14	24527.5 (9133.9-33319.8)		17	18530.0 (5312.0-39019.0)	0.492
	Diagnosis6	23	21199.8 (6971.5-35570.8)		33	11650.0 (8019.0-20135.0)	0.1719
Age=2	Diagnosis1	246	13691.2 (7409.4-19767.5)		262	13689.0 (7800.0-19492.0)	0.5634
	Diagnosis2	27	12380.0 (6335.8-22628.7)		24	10741.0 (7463.0-15789.0)	0.7456
	Diagnosis3	44	14135.1 (11558.3-25676.2)		45	14294.0 (7398.0-24748.0)	0.7045
	Diagnosis4	7	14712.9 (9755.5-17398.8)		2	16733.0 (16535.0-16931.0)	NA
	Diagnosis5	18	21517.9 (7534.9-42109.9)		12	16522.0 (6885.0-22142.0)	0.1146
	Diagnosis6	16	42974.5 (10290.2-64887.3)		16	16869.0 (5089.0-25770.0)	0.06328
Age=3	Diagnosis1	276	13317.4 (6881.9-20163.3)		277	13322.0 (8219.0-22332.0)	0.1252
	Diagnosis2	16	14740.6 (8495.2-26496.2)		20	16722.0 (9931.0-34370.0)	0.898
	Diagnosis3	38	13834.0 (7788.2-21353.3)		49	14887.0 (7536.0-22399.0)	0.9075
	Diagnosis4	7	15388.5 (13479.3-21957.1)		5	15257.0 (13571.0-16579.0)	0.5026
	Diagnosis5	7	13703.1 (10515.7-41663.4)		10	17093.0 (13561.0-32714.0)	0.8757
	Diagnosis6	21	17309.7 (6254.8-24007.1)		15	19406.0 (4544.0-34307.0)	0.8493
Age=4	Diagnosis1	268	16205.6 (7465.8-42737.9)		236	16011.0 (7845.0-37639.0)	0.3117
	Diagnosis2	22	16734.1 (9836.2-22390.2)		30	7768.0 (5261.0-17671.0)	0.5315
	Diagnosis3	62	17035.0 (11900.3-34896.7)		68	15344.0 (8825.0-27008.0)	0.6999
	Diagnosis4	11	14700.7 (14326.9-16436.7)		12	13801.0 (11895.0-23813.0)	0.4131
	Diagnosis5	23	18974.9 (10430.7-26307.7)		16	13266.0 (7836.0-26932.0)	0.9932
	Diagnosis6	28	19531.1 (10877.8-36356.8)		21	10680.0 (6468.0-53424.0)	0.6098
Age=1	Hypertension0	314	13266.1 (8140.3-21854.1)		332	12455.3 (7590.9-18269.1)	0.1772
	Hypertension1	27	12280.8 (7512.4-27280.9)		26	15863.6 (12019.4-25855.2)	0.4156
Age=2	Hypertension0	257	13565.8 (7118.0-25772.5)		268	13349.5 (7392.7-21464.7)	0.2183
	Hypertension1	101	14501.0 (9760.5-21496.5)		93	14551.8 (8500.8-19962.8)	0.4976
Age=3	Hypertension0	232	12551.1 (6759.3-20786.3)		225	14495.2 (8547.3-22238.1)	0.3769
	Hypertension1	133	14494.9 (8372.5-21366.9)		151	14431.0 (7834.8-28131.9)	0.1123
Age=4	Hypertension0	204	16030.9 (7471.5-39229.7)		179	14109.3 (7275.3-27447.7)	0.5731
	Hypertension1	210	16318.6 (10496.8-34313.8)		204	15541.7 (8346.5-39148.8)	0.6293
Age=1	Diabetes0	328	12860.1 (7782.7-21639.7)		350	12672.3 (7869.6-18487.2)	0.2636
	Diabetes1	13	18539.9 (14539.4-25781.5)		8	13403.4 (4426.2-35897.9)	0.8148
Age=2	Diabetes0	307	13990.8 (7693.2-25817.3)		307	13848.5 (7372.2-20893)	0.3118
	Diabetes1	51	13716.5 (7568.1-20967.1)		54	13142.1 (8658.8-21078.2)	0.7399
Age=3	Diabetes0	308	13612.6 (6975.4-21485.7)		331	14595.4 (8583.7-22800.3)	0.1897
	Diabetes1	57	13582.9 (7906.2-20486.4)		45	11325.5 (5667.1-35203.3)	0.8821
Age=4	Diabetes0	338	16205.6 (8104.0-36644.3)		314	15020.1 (7686.7-33165.8)	0.306
	Diabetes1	76	16849.1 (12043.8-35537.3)		69	15898.6 (7833.0-49537.8)	0.4135
Age=1	Smoking0	250	13266.1 (7566.3-23754.3)		266	12756.5 (8081.0-18145.2)	0.3456
	Smoking1	91	13007.4 (8898.6-21414.5)		92	12529.7 (7077.2-20847.8)	0.5776
Age=2	Smoking0	228	13786.1 (7479.3-24039.1)		218	12973.0 (6786.9-19427.1)	0.1955
	Smoking1	130	14744.4 (8022.5-24415.4)		143	15026.2 (9210.0-23702.8)	0.7689
Age=3	Smoking0	178	13469.1 (6614.8-20101.6)		191	15257.2 (8161.3-24279.9)	0.1042
	Smoking1	187	14371.9 (7713.6-21513.4)		185	12765.0 (8369.7-22332.0)	0.392
Age=4	Smoking0	244	17043.0 (9714.2-39690.2)		248	15442.1 (8294.5-35354.4)	0.2773
	Smoking1	170	15245.7 (7905.2-30872.5)		135	14997.2 (6249.5-37111.1)	0.751
Age=1	Drinking0	242	12748.3 (7371.3-22987.4)		266	12577.5 (8024.5-18059.8)	0.2051
	Drinking1	99	13906.2 (9304.0-22669.8)		92	13126.3 (7407.0-22122.4)	0.9254
Age=2	Drinking0	230	13746.7 (7368.3-22855.5)		222	12792.4 (6874.7-19907.0)	0.2338
	Drinking1	128	15060.8 (9133.1-26397.8)		139	15053.4 (9362.3-23474.8)	0.1334
Age=3	Drinking0	196	12415.7 (6046.7-19927.3)		192	14799.4 (7330.4-27567.7)	0.1917
	Drinking1	169	14827.2 (8631.0-22949.2)		184	13003.8 (8666.3-22284.6)	0.297
Age=4	Drinking0	249	15960.3 (7254.8-32008.7)		249	15230.4 (8141.7-35533.6)	0.8459
	Drinking1	165	17141.6 (10563.3-42223.2)		134	14777.3 (7215.6-34819.5)	0.181
Age=1	District0	100	11953.7 (6558.3-23419.6)		120	12451.0 (6855.0-19635.0)	0.7575
	District1	241	13455.4 (9137.5-21551.9)		238	12762.0 (8415.0-18145.0)	0.1846
Age=2	District0	119	13990.8 (8072.0-30667.0)		127	12310.0 (6249.0-18776.0)	0.06663
	District1	239	13838.9 (7419.8-22168.3)		234	14396.0 (8077.0-21893.0)	0.9111
Age=3	District0	157	11095.9 (7003.3-19858.6)		110	10930.0 (6329.0-20058.0)	0.6122
	District1	208	14486.0 (7647.2-21928.7)		266	15264.0 (9640.0-27242.0)	0.2328
Age=4	District0	133	17729.8 (7501.3-39193.4)		95	14566.0 (7378.0-37340.0)	0.522
	District1	281	15782.4 (9517.8-34932.5)		288	15269.0 (7826.0-35354.0)	0.6114
Age=1	Education1	2	30145.9 (20568.2-39723.6)		4	21966.7 (8977.6-48644.0)	NA
	Education2	40	11391.3 (6016.4-26765.2)		49	13678.1 (6963.5-19562.4)	0.3018
	Education3	118	13565.3 (8677.8-20380.2)		139	12422.1 (7223.6-17724.9)	0.7563
	Education4	60	15315.3 (10455.5-27534.3)		75	13063.4 (8803.2-20533.2)	0.2792
	Education5	121	12069.5 (7809.2-24158.6)		91	13044.9 (8370.5-21940.0)	0.9265
Age=2	Education1	23	13984.4 (6637.3-26837.2)		17	10852.1 (6139.3-18479.7)	0.1588
	Education2	100	14769.4 (8226.5-23240.6)		97	13949.6 (8225.9-19205.3)	0.5007
	Education3	127	11715.6 (7062.1-22072.0)		137	12114.6 (6410.0-22746.9)	0.2091
	Education4	78	14024.0 (7471.9-25441.8)		77	16690.0 (10083.3-21650.0)	0.7959
	Education5	30	14425.2 (9558.3-25548.6)		33	13227.8 (9276.9-18425.9)	0.2434
Age=3	Education1	45	11376.8 (6795.5-30009.5)		34	13495.8 (6750.0-28217.0)	0.6314
	Education2	172	13364.0 (7350.6-20706.5)		159	12986.3 (8236.5-21735.9)	0.2487
	Education3	98	15318.6 (8519.8-22302.5)		117	15158.3 (8681.7-28030.2)	0.4789
	Education4	36	11601.8 (5438.3-16202.2)		39	16193.0 (8733.2-29320.0)	0.02727
	Education5	14	16460.3 (10698.6-55361.1)		27	17634.2 (8360.6-24576.9)	0.8027
Age=4	Education1	61	32008.7 (12144.1-59857.6)		59	13216.6 (7375.2-30085.3)	0.001222
	Education2	197	15152.4 (7501.3-30732.6)		150	15113.8 (7508.5-37349.0)	0.3128
	Education3	83	17658.1 (6994.6-40057.3)		89	15003.6 (7527-30708.3)	0.2225
	Education4	45	16726.4 (9549.7-22260.6)		43	18000.1 (10660.7-35282.9)	0.3
	Education5	28	17961.9 (12011.8-33588.3)		42	15835.9 (9179.9-35089.6)	0.8347
BMI=1	LOS1	124	7152.8 (4863.6-11582.6)		143	8380.6 (5146.6-12014.4)	0.2607
	LOS2	38	16090.2 (13356.0-20905.1)		49	14608.4 (9640.5-18599.6)	0.1702
	LOS3	30	36752.2 (22141.0-47717.0)		32	38638.9 (32998.6-50796.2)	0.6982
	LOS4	16	75673.7 (59619.3-114035.7)		15	78364.9 (53683.9-104559.3)	0.3769
BMI=2	LOS1	501	9769.1 (5351.9-14517.9)		476	9440.7 (5357.7-13942.3)	0.7227
	LOS2	240	15347.3 (10976.5-25485.4)		253	15314.0 (10633.5-22841.5)	0.8772
	LOS3	174	42531.9 (29027.2-59072.9)		156	46106.6 (28814.8-60741.2)	0.5984
	LOS4	52	90201.1 (68748.8-115285.5)		33	80087.4 (64886.9-126637.3)	0.9302
BMI=3	LOS1	112	9377.4 (5325.4-14284.4)		111	9541.8 (6302.0-13546.2)	0.7649
	LOS2	91	17972.4 (13509.5-24943.4)		86	16580.2 (13147.8-24120.2)	0.6769
	LOS3	44	44939.6 (30778.3-55553.2)		59	44005.4 (33372.4-55126)	0.3
	LOS4	8	74338.8 (61351.8-92388.6)		7	85571.5 (77284.9-133445.3)	0.6311
BMI=4	LOS1	16	9310.0 (6759.7-14076.6)		23	8152.9 (5630.7-17457.1)	0.3437
	LOS2	17	14020.9 (11865.9-20336.4)		17	16316.3 (13056.5-27542.5)	0.3851
	LOS3	13	32729.7 (21446.2-43068.8)		14	30506.6 (22451.3-60840.5)	0.9728
	LOS4	2	91505.4 (76592.2-106418.6)		4	81543.4 (69801.3-100994.1)	NA
BMI=1	Surgery0	175	11432.5 (6190.3-17493.1)		193	12068.0 (6767.0-20684.0)	0.9529
	Surgery1	33	14086.1 (6244.7-34390.1)		46	8620.0 (5335.0-13029.0)	0.02375
BMI=2	Surgery0	789	14731.0 (8570.9-30647.3)		729	14520.0 (8402.0-26131.0)	0.406
	Surgery1	178	11744.6 (5625.2-17561.8)		189	10449.0 (6064.0-16616.0)	0.2978
BMI=3	Surgery0	205	17058.8 (10868.7-29994.1)		222	16143.0 (9996.0-32582.0)	0.7622
	Surgery1	50	10871.9 (5852.2-16271.6)		41	12955.0 (6951.0-20152.0)	0.2538
BMI=4	Surgery0	40	18403.5 (9580.5-27307.5)		50	20269.0 (9300.0-30686.0)	0.5686
	Surgery1	8	17149.4 (13161.4-20445.4)		8	15266.0 (5485.0-17078.0)	0.5887
BMI=1	Diagnosis1	162	10298.5 (6002.8-15475.1)		180	11360.0 (6606.0-17512.0)	0.8506
	Diagnosis2	4	9120.6 (1522.2-21737.1)		6	10796.0 (6395.0-14511.0)	0.9315
	Diagnosis3	13	17229.8 (12642.0-38157.8)		20	9495.0 (4718.0-16137.0)	0.1335
	Diagnosis4	1	19212.1 (19212.1-19212.1)		0	NA	NA
	Diagnosis5	19	36033.2 (19699.2-48581.4)		20	18348.0 (11381.0-37033.0)	0.2042
	Diagnosis6	10	22641.1 (16607.4-49178.6)		12	9518.0 (4983.0-11142.0)	0.09358
BMI=2	Diagnosis1	624	14232.9 (7808.7-25649.8)		605	13940.0 (8242.0-22330.0)	0.35
	Diagnosis2	68	13968.9 (6616.9-26095.4)		68	10693.0 (6114.0-25800.0)	0.5472
	Diagnosis3	163	13446.8 (8982.5-24706.0)		144	13477.0 (7983.0-20198.0)	0.7269
	Diagnosis4	18	14595.2 (10358.5-15474.4)		17	15352.0 (12230.0-19633.0)	0.2296
	Diagnosis5	36	13509.1 (7710.8-26602.5)		33	14447.0 (6064.0-28288.0)	0.8125
	Diagnosis6	58	22055.9 (13136.4-37843.0)		51	13956.0 (6496.0-23046.0)	0.04713
BMI=3	Diagnosis1	143	17019.4 (9256.0-31076.7)		155	16007.0 (9225.0-32028.0)	0.3652
	Diagnosis2	23	13959.3 (7995.6-23332.5)		18	8736.0 (5628.0-13517.0)	0.9382
	Diagnosis3	54	13937.9 (10996.7-22379.5)		61	15037.0 (11943.0-27702.0)	0.1157
	Diagnosis4	11	16818.6 (13479.3-17915.7)		7	12410.0 (11930.0-13610.0)	0.02272
	Diagnosis5	7	19708.2 (7110.4-34363.7)		2	67743.0 (66312.0-69175.0)	0.5531
	Diagnosis6	17	11094.9 (6254.8-18904.1)		20	30210.0 (5825.0-34722.0)	0.06829
BMI=4	Diagnosis1	26	19756.9 (12250.5-25744.5)		36	20635.0 (7957.0-56722.0)	0.6728
	Diagnosis2	4	10500.0 (9458.3-16414.8)		6	21216.0 (9026.0-29952.0)	0.5371
	Diagnosis3	14	17146.4 (13805.6-24836.7)		14	13682.0 (12220.0-19073.0)	0.1452
	Diagnosis4	0	NA		0	NA	NA
	Diagnosis5	0	NA		1	1424.0 (1424.0-1424.0)	NA
	Diagnosis6	3	3542.5 (2801.3-8752.5)		2	21325.0 (17870.0-24779.0)	0.2305
BMI=1	Hypertension0	170	11299.6 (6021.9-18358.3)		187	10383.7 (5964.3-18163.8)	0.5916
	Hypertension1	38	15256.4 (8536.3-22034.9)		52	12952.3 (8053.7-21084.2)	0.4035
BMI=2	Hypertension0	675	13864.3 (7594.5-25936.4)		645	13547.9 (7806.5-20440.8)	0.237
	Hypertension1	292	14974.1 (8608.2-27773.5)		273	14431.0 (7833.0-26154.3)	0.6566
BMI=3	Hypertension0	138	15683.0 (9192.5-27840.7)		142	14467.9 (8522.3-26034.2)	0.3889
	Hypertension1	117	15493.1 (8361.3-25830.4)		121	16470.3 (9985.7-34116.0)	0.2111
BMI=4	Hypertension0	24	14673.8 (9349.8-21686.1)		30	15365.9 (9115.6-30686.3)	0.5983
	Hypertension1	24	19807.4 (11691.2-39827.9)		28	20269.3 (8259.8-29435.5)	0.772
BMI=1	Diabetes0	189	11773.7 (6162.0-18516.1)		220	10939.8 (6130.6-18162.3)	0.2047
	Diabetes1	19	15186.2 (7620.0-30162.3)		19	12957.5 (8416.4-36448.2)	0.2107
BMI=2	Diabetes0	837	14194.5 (7829.6-27465.2)		811	13764.2 (8019.6-21317.6)	0.09542
	Diabetes1	130	14466.1 (8133.2-20853.8)		107	13733.0 (7330.7-33212.9)	0.9249
BMI=3	Diabetes0	214	15198.3 (9141.7-25734.1)		222	15146.7 (9867.4-30897.0)	0.764
	Diabetes1	41	19708.2 (7962.4-34285.6)		41	16470.3 (8634.0-30790.0)	0.7177
BMI=4	Diabetes0	41	15326.8 (11324.3-25660.6)		49	19992.2 (8453.1-30708.3)	0.4717
	Diabetes1	7	21707.9 (14465.1-33615.1)		9	13056.5 (7195.8-19361.4)	0.7903
BMI=1	Smoking0	140	11648.6 (6125.8-21611.4)		164	10361.4 (6091.2-18752.7)	0.1324
	Smoking1	68	12061.4 (6383.1-17199.4)		75	11735.0 (6987.4-17828.6)	0.2896
BMI=2	Smoking0	570	14117.9 (7762.4-28330.4)		561	13848.5 (7833.0-22534.4)	0.1367
	Smoking1	397	14662.8 (8262.5-23860.1)		357	13376.8 (7543.3-20777.7)	0.9845
BMI=3	Smoking0	156	15307.4 (9150.0-26519.9)		158	15086.8 (9018.7-28008.2)	0.6296
	Smoking1	99	16175.4 (7924.3-25933.8)		105	16913.0 (8634.4-34495.2)	0.7717
BMI=4	Smoking0	34	18403.5 (12250.5-24082.5)		40	16342.3 (8193.6-30287.5)	0.485
	Smoking1	14	15521.6 (8594.6-30962.5)		18	23889.6 (9525.8-28374.1)	0.9896
BMI=1	Drinking0	150	11299.6 (5985.4-17575.6)		165	9941.7 (5921.7-18160.8)	0.301
	Drinking1	58	13636.5 (9554.7-26314.5)		74	12546.2 (7623.5-33351.3)	0.7517
BMI=2	Drinking0	577	13906.1 (7204.2-25801.0)		563	13715.3 (7760.8-22809.3)	0.8088
	Drinking1	390	14780.8 (9302.5-28768.7)		355	13813.6 (8113.7-20838.2)	0.1061
BMI=3	Drinking0	160	14426.7 (7911.5-26519.9)		162	14653.4 (8719.0-27294.0)	0.9995
	Drinking1	95	16818.6 (10093.7-25931.7)		101	17227.2 (9827.9-32949.2)	0.8689
BMI=4	Drinking0	30	18403.5 (11467.7-24075.2)		39	16368.4 (10146.9-29897.7)	0.5089
	Drinking1	18	16655.3 (9023.0-30962.5)		19	20546.5 (6483.2-29250.7)	0.9476
BMI=1	District0	126	14044.5 (6942.4-36302.0)		149	12958.0 (8283.0-26785.0)	0.1845
	District1	82	9026.2 (5403.7-14593.9)		90	8149.0 (5351.0-13964.0)	0.3653
BMI=2	District0	643	14147.0 (7852.3-24696.2)		648	13944.0 (8191.0-22246.0)	0.7134
	District1	324	14481.9 (7984.7-30861.6)		270	12871.0 (7097.0-22021.0)	0.08321
BMI=3	District0	172	14923.9 (9728.6-24595.2)		182	15087.0 (9065.0-32582.0)	0.3275
	District1	83	17301.6 (7397.0-30780.4)		81	15828.0 (8409.0-27702.0)	0.236
BMI=4	District0	28	19071.6 (11850.2-27227.2)		47	19361.0 (11943.0-30428.0)	0.6098
	District1	20	13895.8 (9349.8-22696.1)		11	12744.0 (6677.0-25186.0)	0.9295
BMI=1	Education1	24	10045.6 (5967.5-24857.1)		21	8832.0 (6653.0-16018.0)	0.2021
	Education2	68	10762.3 (4953.6-19322.5)		77	11511.0 (6493.0-16533.0)	0.6255
	Education3	61	11518.8 (7118.0-17658.1)		75	10334.0 (5504.0-16177.0)	0.8165
	Education4	32	13704.5 (6914.6-22946.0)		38	11755.0 (7254.0-25976.0)	0.4535
	Education5	23	11919.1 (6345.7-15931.7)		28	15104.0 (8401.0-31883.0)	0.931
BMI=2	Education1	81	26145.2 (10692.2-57114.5)		68	13582.0 (6248.0-25969.0)	0.002169
	Education2	355	13972.0 (7968.3-21715.6)		284	13997.0 (8122.0-22301.0)	0.3333
	Education3	263	14735.7 (7785.4-23529.8)		308	12899.0 (7393.0-20747.0)	0.1669
	Education4	136	14523.1 (7213.6-21693.8)		138	15329.0 (10164.0-21147.0)	0.6613
	Education5	132	12870.4 (8384.1-27665.6)		120	13136.0 (7972.0-22797.0)	0.9437
BMI=3	Education1	21	11376.8 (5800.7-23767.8)		21	14494.0 (9132.0-32629.0)	0.5908
	Education2	74	17064.2 (10014.7-39115.0)		79	15459.0 (8387.0-35978.0)	0.8528
	Education3	83	14433.0 (6789.1-24101.1)		81	15183.0 (9318.0-27702.0)	0.9693
	Education4	46	15504.7 (11704.0-23489.6)		45	16337.0 (10028.0-25673.0)	0.9581
	Education5	31	17702.3 (10467.9-28442.5)		37	13877.0 (10220.0-26340.0)	0.8719
BMI=4	Education1	5	15326.8 (14057.7-18186.6)		4	18280.0 (6554.0-29560.0)	0.5471
	Education2	12	20387.0 (10928.0-25715.4)		15	11841.0 (5758.0-19677.0)	0.6259
	Education3	19	18879.0 (8861.4-37899.3)		18	22025.0 (7639.0-29295.0)	0.497
	Education4	5	19177.3 (18966.0-25772.5)		13	28421.0 (20546.0-46575.0)	0.05888
	Education5	7	13962.4 (10627.8-14077.1)		8	14095.0 (13499.0-27117.0)	0.1698
LOS=1	Surgery0	141	8030.3 (3622.3-14086.1)		162	8545.0 (5140.0-13870.0)	0.7182
	Surgery1	612	9306.5 (5473.1-14071.6)		591	9132.0 (5496.0-13529.0)	0.6586
LOS=2	Surgery0	86	12125.3 (6402.7-19530.9)		84	10710.0 (7110.0-17075.0)	0.3169
	Surgery1	300	17015.2 (12861.2-25776.0)		321	16368.0 (12951.0-24774.0)	0.6483
LOS=3	Surgery0	31	27548.7 (20639.2-34589.7)		34	27128.0 (14567.0-44074.0)	0.7614
	Surgery1	230	43801.3 (30855.2-60023.1)		227	46001.0 (31291.0-60578.0)	0.9829
LOS=4	Surgery0	11	78086.6 (56254.2-90335.7)		4	44236.0 (36022.0-54366.0)	0.09022
	Surgery1	67	86361.8 (67067.4-120567.6)		55	85571.0 (68323.0-100000.0)	0.7928
LOS=1	Diagnosis1	577	9389.7 (5779.3-14494.9)		575	9651.0 (5914.0-14524.0)	0.2744
	Diagnosis2	31	4804.7 (2080.1-9701.5)		39	6848.0 (4465.0-9326.0)	0.8793
	Diagnosis3	97	10265.5 (4477.3-12323.8)		89	8402.0 (4446.0-12422.0)	0.8275
	Diagnosis4	10	10799.4 (6542.1-14316.5)		9	11599.0 (9986.0-12261.0)	0.5316
	Diagnosis5	17	6193.2 (3693.5-9770.9)		16	5836.0 (4059.0-9649.0)	0.6028
	Diagnosis6	21	5243.9 (2060.1-15773.7)		25	4680.0 (1940.0-8947.0)	0.2526
LOS=2	Diagnosis1	168	17710.7 (11423.7-24718.6)		202	17454.0 (12323.0-25767.0)	0.4187
	Diagnosis2	50	14300.9 (9844.3-22552.2)		33	10195.0 (6295.0-15324.0)	0.01952
	Diagnosis3	88	15120.2 (12373.8-20441.1)		100	14538.0 (11828.0-18396.0)	0.3932
	Diagnosis4	19	16418.4 (14326.9-22145.5)		13	15257.0 (13571.0-17129.0)	0.738
	Diagnosis5	25	17902.7 (11968.1-25066.7)		24	16752.0 (12193.0-19851.0)	0.5217
	Diagnosis6	36	17648.5 (9979.2-28285.3)		33	13956.0 (7820.0-21849.0)	0.1304
LOS=3	Diagnosis1	156	46759.4 (33666.9-62236.7)		159	49824.0 (35429.0-64066.0)	0.8741
	Diagnosis2	16	32847.5 (25809.5-38373.3)		22	32635.0 (28447.0-37473.0)	0.8567
	Diagnosis3	49	32657.3 (23754.9-43068.8)		43	29710.0 (22177.0-43326.0)	0.965
	Diagnosis4	1	12872.1 (12872.1-12872.1)		3	37617.0 (34976.0-83345.0)	NA
	Diagnosis5	12	36851.4 (27017.3-44625.2)		11	55039.0 (38036.0-69112.0)	0.05585
	Diagnosis6	27	33847.4 (21524.8-60285.0)		23	34116.0 (16911.0-47187.0)	0.2697
LOS=4	Diagnosis1	54	88433.4 (69033.9-119754.0)		40	85313.0 (63831.0-100000.0)	0.5381
	Diagnosis2	2	89315.4 (79067.2-99563.5)		4	100000.0 (81565.0-200000.0)	NA
	Diagnosis3	10	66988.5 (60538.0-85441.2)		7	80087.0 (71295.0-100000.0)	0.42
	Diagnosis4	0	NA		0	NA	NA
	Diagnosis5	8	98442.2 (59389.3-117727.5)		4	72083.0 (65291.0-85212.0)	0.4101
	Diagnosis6	4	61967.4 (47003.8-149530.6)		4	71895.0 (58810.0-81178.0)	0.471
LOS=1	Hypertension0	524	8770 (5134.6-13543.2)		538	9021.8 (5402.8-13504.7)	0.3279
	Hypertension1	229	10537.1 (5665.8-15021.0)		215	9132.1 (5456.9-14635.0)	0.5635
LOS=2	Hypertension0	261	15623.1 (11286.2-24441.4)		271	15479.2 (11040.8-21837.9)	0.5102
	Hypertension1	125	16856.3 (12351.4-23860.1)		134	15652.0 (10831.6-25766.9)	0.7996
LOS=3	Hypertension0	173	43223.5 (28288.4-57122)		154	41708.6 (29422.7-58128.1)	0.5645
	Hypertension1	88	37411.2 (27157-59241.5)		107	45768.3 (29338.1-61881.9)	0.4866
LOS=4	Hypertension0	49	82825.9 (62994.4-112434.2)		41	78364.9 (58294.4-103208.7)	0.7796
	Hypertension1	29	88167.9 (68819.1-121331.8)		18	101115.0 (68143.4-132031.9)	0.9926
LOS=1	Diabetes0	643	9210.5 (5165.5-13891.7)		669	9247.5 (5499.5-13712.0)	0.2522
	Diabetes1	110	8936.1 (5504-14925.7)		84	7858.2 (4570.9-12721.5)	0.09411
LOS=2	Diabetes0	341	15798.0 (11365-23631.7)		358	15665.6 (11196.0-22478.0)	0.7728
	Diabetes1	45	18728.4 (13838.9-28315.1)		47	14921.1 (10238.8-26302.7)	0.2693
LOS=3	Diabetes0	228	41973 (27605.9-57586.0)		227	41919.9 (28616.1-57810.4)	0.4468
	Diabetes1	33	40903.3 (28798.1-58678.4)		34	53127.8 (33272.4-73400.8)	0.031
LOS=4	Diabetes0	69	85457.5 (66489-120058.6)		48	85010.8 (69175.9-126202.4)	0.8669
	Diabetes1	9	85321 (70983.3-95992.3)		11	77703.8 (63424.2-91550.8)	0.926
LOS=1	Smoking0	428	8543.9 (4760.6-13700.9)		451	8650.4 (5297.9-13460.0)	0.3676
	Smoking1	325	9760.5 (5963.6-14825.9)		302	9536.3 (5709.7-13924.6)	0.7516
LOS=2	Smoking0	251	15336.0 (11370.9-22138.6)		280	15477.8 (10990.0-22425.4)	0.9218
	Smoking1	135	18057.0 (11917.0-25694.9)		125	15797.7 (10786.8-24178.1)	0.2559
LOS=3	Smoking0	171	39497.3 (27526.4-55752.3)		158	40391.5 (29116.0-58452.9)	0.3956
	Smoking1	90	44478.3 (27981.0-60002.9)		103	45768.3 (30681.0-59834.6)	0.3251
LOS=4	Smoking0	50	90201.1 (67820.7-123446.7)		34	79794.9 (59169.2-124585.3)	0.3549
	Smoking1	28	74669.4 (61377.9-101346.9)		25	84450.2 (66039.7-95752.0)	0.2514
LOS=1	Drinking0	465	8030.3 (4881.5-13845.6)		461	8645.7 (5109.4-13359.5)	0.4277
	Drinking1	288	10548.5 (5958.1-14549.0)		292	9793.6 (6036.0-13919.1)	0.7481
LOS=2	Drinking0	244	15364.7 (11362.7-22463.7)		275	15036.5 (10534.2-22341.9)	0.9885
	Drinking1	142	17393.9 (12193.9-25601.6)		130	16641.7 (12214.4-25427.4)	0.2978
LOS=3	Drinking0	165	39497.3 (25746.8-55757.0)		159	42389.7 (29451.1-60517.3)	0.4348
	Drinking1	96	45316.4 (33338.7-60893.9)		102	43371.1 (28522.4-56206.8)	0.2906
LOS=4	Drinking0	43	90141.7 (69670.4-120567.6)		34	83858.9 (56387.0-131643.8)	0.7787
	Drinking1	35	80227.5 (61814.4-107337.5)		25	83964.2 (71514.0-95752.0)	0.857
LOS=1	District0	258	8108.2 (4996.5-13323.7)		244	8225.0 (5301.0-12338.0)	0.7977
	District1	495	10002.7 (5347.3-14220.9)		509	9825.0 (5516.0-14031.0)	0.5157
LOS=2	District0	134	16317.7 (11399.2-25866.2)		120	15357.0 (9023.0-21293.0)	0.068
	District1	252	15869.6 (11697.4-22498.1)		285	15798.0 (11572.0-22942.0)	0.6319
LOS=3	District0	93	39497.3 (28288.4-59085.2)		79	46558.0 (29196.0-57671.0)	0.4377
	District1	168	42617.4 (27605.9-57231.5)		182	41344.0 (29558.0-60841.0)	0.6409
LOS=4	District0	24	83638.1 (61581.0-105037.6)		9	86176.0 (66040.0-100000.0)	0.6094
	District1	54	87264.8 (67197.2-119754.0)		50	82026.0 (64401.0-100000.0)	0.8339
LOS=1	Education1	42	5936.8 (4230.4-8966.4)		54	7044.9 (4748.9-12782.5)	0.09924
	Education2	277	9623.0 (5160.3-14420.4)		224	8880.1 (5734.4-13843.4)	0.8724
	Education3	229	8872.8 (5395.6-14052.8)		275	9100.9 (5108.9-12897.1)	0.3754
	Education4	114	10038.9 (5382.2-14773)		112	11481.8 (6566.4-15437.1)	0.197
	Education5	91	10520.1 (5099.0-13577.2)		88	10169.5 (5669.7-14172.5)	0.5188
LOS=2	Education1	37	14147.0 (11376.8-20433.1)		31	14493.9 (9499.1-19942.7)	0.9749
	Education2	119	16856.3 (11321.0-25694.9)		122	14511.7 (9228.9-21082.8)	0.1969
	Education3	114	17729.6 (12771.8-23480.4)		119	16667.1 (12940.8-24568.2)	0.5256
	Education4	56	15551.0 (13032.7-22932.3)		73	16336.9 (11716.2-22284.7)	0.959
	Education5	60	13991.7 (10903.5-24469.5)		60	15370.8 (11189.0-20580.2)	0.4994
LOS=3	Education1	40	49056.3 (33187.1-60515.6)		27	35868.4 (29770.8-53132.6)	NA
	Education2	92	41290.5 (29856.5-53909.3)		89	42037.3 (25929.4-56264.3)	0.2947
	Education3	58	45423.3 (29398.8-59960.3)		71	53035.9 (36795.8-65011.1)	0.9225
	Education4	40	35188.3 (24174.7-46514.1)		40	43243.1 (30770.1-56222.2)	0.8923
	Education5	31	36706.6 (26519.2-60652.1)		34	31993.0 (13627.8-50036.0)	0.2517
LOS=4	Education1	12	96864.1 (77983.6-119399.3)		2	60614.5 (52377.7-68851.3)	0.4147
	Education2	21	91905.9 (74440.7-112434.2)		20	104232.8 (61530.8-144133.9)	0.6364
	Education3	25	78155.7 (62417.9-104863.3)		17	79502.4 (64886.9-103208.7)	0.2791
	Education4	9	62994.4 (49513.9-113694.4)		9	74454.4 (45987.6-77750.3)	0.5377
	Education5	11	85321.0 (69004.9-134275.4)		11	91461.1 (78762.0-109922.2)	0.6615
Surgery=0	Diagnosis1	146	13588.1 (6671.7-18286.7)		157	11399.0 (7536.0-16695.0)	0.3279
	Diagnosis2	17	3463.1 (1629.3-10345.2)		25	4629.0 (3591.0-9828.0)	0.8842
	Diagnosis3	50	10739.8 (5368.2-23654.4)		49	8661.0 (5771.0-16568.0)	0.9361
	Diagnosis4	2	7729.3 (5011.9-10446.6)		1	2723.0 (2723.0-2723.0)	NA
	Diagnosis5	29	13703.1 (8030.3-23297.5)		25	13217.0 (6064.0-18167.0)	0.2578
	Diagnosis6	25	6504.0 (3164.9-13249.1)		27	9193.0 (4966.0-15124.0)	0.1781
Surgery=1	Diagnosis1	809	14105.3 (7399.0-26037.2)		819	14520.0 (8127.0-28499.0)	0.7948
	Diagnosis2	82	14581.3 (9084.4-26907.4)		73	12951.0 (7668.0-29365.0)	0.3826
	Diagnosis3	194	14123.8 (11430.2-25794.1)		190	14439.0 (11019.0-22541.0)	0.8078
	Diagnosis4	28	14706.8 (12427.9-17165.3)		24	14605.0 (12254.0-17650.0)	0.2865
	Diagnosis5	33	30647.3 (11090.4-48574.1)		30	34768.0 (9912.0-58217.0)	0.696
	Diagnosis6	63	24449.9 (17532.9-40878.1)		58	17885.0 (7760.0-30884.0)	0.04124
Surgery=0	Hypertension0	166	11771.8 (4860.0-17719.0)		185	10194.7 (6139.3-16347.8)	0.5755
	Hypertension1	103	12359.8 (6451.1-20107.8)		99	10786.8 (5814.3-17198.9)	0.3285
Surgery=1	Hypertension0	841	13906.2 (7809.2-27529.2)		819	13795.1 (8034.8-25084.4)	0.4009
	Hypertension1	368	16039.2 (10546.1-30765.0)		375	16193.0 (8896.8-32933.4)	0.8779
Surgery=0	Diabetes0	214	11331.5 (5330.6-17561.8)		246	10718.0 (6134.1-16552.9)	0.8862
	Diabetes1	55	14344.7 (8602.0-20250.0)		38	8910.6 (5391.3-18141.9)	0.1657
Surgery=1	Diabetes0	1067	14517.9 (8467.6-27932.9)		1056	14433.3 (8367.9-26507.0)	0.2217
	Diabetes1	142	15043.0 (7908.4-30722.2)		138	15224.9 (8228.6-36956.9)	0.1146
Surgery=0	Smoking0	159	12351.4 (4289.3-18757.4)		166	9996.1 (5792.4-16327.0)	0.2164
	Smoking1	110	12010.7 (6737.7-18286.7)		118	11178.4 (6701.0-17068.2)	0.1603
Surgery=1	Smoking0	741	14517.9 (8361.3-30964.8)		757	14493.9 (8409.5-26932.2)	0.1662
	Smoking1	468	14850.3 (8383.6-25690.9)		437	14566.7 (8207.9-30387.4)	0.453
Surgery=0	Drinking0	163	11790.2 (4929.0-17535.1)		168	10523.4 (6049.7-16564.5)	0.3317
	Drinking1	106	12614.6 (6439.3-20200.3)		116	10458.6 (6032.5-16620.9)	0.07192
Surgery=1	Drinking0	754	14130.7 (7495.6-26678.3)		761	14056.7 (8115.5-27524.9)	0.8269
	Drinking1	455	15348.8 (9935.3-33304)		433	15288.4 (8878.8-30387.4)	0.4315
Surgery=0	District0	89	8440.8 (4022.3-15731.9)		88	10216.0 (6057.0-16314.0)	0.7825
	District1	180	13324.8 (6337.8-20014.4)		196	10640.0 (5894.0-16650.0)	0.03461
Surgery=1	District0	420	14745.6 (8079.4-30163.6)		364	12769.0 (6702.0-24361.0)	0.04894
	District1	789	14683.5 (8502.8-27529.2)		830	15101.0 (9176.0-30346.0)	0.7919
Surgery=0	Education1	20	14210.2 (10041.7-21861.1)		26	6465.0 (4843.0-13173.0)	0.006242
	Education2	111	11828.0 (5972.3-17104.1)		95	11475.0 (8054.0-16602.0)	0.3234
	Education3	67	12466.9 (5448.7-17798.0)		90	10208.0 (5713.0-17012.0)	0.5965
	Education4	38	13643.2 (5381.0-24141.5)		37	11716.0 (6927.0-17319.0)	0.1778
	Education5	33	11249.7 (4370.1-21146.8)		36	8572.0 (5038.0-12972.0)	0.3298
Surgery=1	Education1	111	15244.1 (7809.9-50397.7)		88	14568.0 (8525.0-32872.0)	0.2176
	Education2	398	14678.5 (8327.2-29597.9)		360	14089.0 (7780.0-30358.0)	0.714
	Education3	359	14739.8 (8034.1-24227.7)		392	13399.0 (7767.0-26085.0)	0.262
	Education4	181	14870.2 (8683.0-22811.6)		197	16115.0 (10028.0-27643.0)	0.2225
	Education5	160	13637.3 (9573.6-28959.6)		157	15089.0 (9921.0-28110.0)	0.6304
Diagnosis=1	Hypertension0	649	12836.0 (6869.7-21741.8)		671	13430.5 (7626.6-21481.5)	0.7558
	Hypertension1	306	15633.4 (9737.3-29728.5)		305	15288.4 (8400.9-27643.3)	0.3785
Diagnosis=2	Hypertension0	62	14421.8 (8349.7-26907.4)		66	9670.6 (5517.7-17312.6)	0.8863
	Hypertension1	37	11502.1 (7009.1-20848.2)		32	12030.5 (6294.3-26634.5)	0.4267
Diagnosis=3	Hypertension0	178	13674.5 (10114.9-23112)		159	13063.4 (8517.8-18133.5)	0.7419
	Hypertension1	66	14161.5 (10416.6-29198.8)		80	14962.0 (8581.6-26425.4)	0.2757
Diagnosis=4	Hypertension0	18	14423.8 (10358.5-16189.6)		16	14414.0 (12072.5-16716.9)	0.2237
	Hypertension1	12	15369.2 (13521.7-20272.8)		9	13951.9 (12261.3-19212.1)	0.8736
Diagnosis=5	Hypertension0	44	24527.5 (11664.9-38461.6)		40	15212.8 (6041.1-29498.3)	0.08803
	Hypertension1	18	11083.6 (7054.7-21657.4)		15	16837.3 (13114.5-52192.4)	0.05326
Diagnosis=6	Hypertension0	56	21551.3 (7349.9-38887.9)		52	11199.9 (7003.4-21865.6)	0.01608
	Hypertension1	32	17983.0 (10877.8-26799.3)		33	19406.3 (5235.4-39235.8)	0.8095
Diagnosis=1	Diabetes0	821	13838.2 (7313.0-23860.1)		854	13847.8 (8101.8-22526.9)	0.2118
	Diabetes1	134	14861.4 (7908.4-24219.1)		122	13681.1 (7601.6-31990.2)	0.3148
Diagnosis=2	Diabetes0	83	13965.7 (7475.7-26262.2)		89	10756.3 (6293.1-24942.8)	0.5627
	Diabetes1	16	13002.9 (5822.6-20566.7)		9	7833.0 (4536.2-8972.7)	0.5242
Diagnosis=3	Diabetes0	217	13733.8 (10151.1-23366.7)		213	13931.9 (8650.4-22268.7)	0.9551
	Diabetes1	27	14927.2 (10141.8-33147.2)		26	12863.4 (8417.7-16623.7)	0.321
Diagnosis=4	Diabetes0	26	14698.2 (11168.5-17006.9)		23	13649.3 (11914.6-16458.2)	0.3842
	Diabetes1	4	13786.4 (12427.9-22655.7)		2	40936.8 (36636.2-45237.3)	NA
Diagnosis=5	Diabetes0	56	19699.2 (9594.0-35739.5)		48	16197.9 (7125.8-36560.2)	0.4606
	Diabetes1	6	17221.9 (9655.7-27912.5)		7	20080.5 (14779.1-50915.9)	0.585
Diagnosis=6	Diabetes0	78	19639.4 (7412.3-36932.7)		75	11650.4 (5690.1-26204.5)	0.02354
	Diabetes1	10	19937.6 (12301.7-31034.8)		10	42107.1 (11622.9-63306.0)	0.2799
Diagnosis=1	Smoking0	525	14046.3 (7214.8-29283.0)		555	13948.0 (7898.0-23582.9)	0.7841
	Smoking1	430	14019.8 (7609.1-21694.3)		421	13582.6 (8028.0-25204.2)	0.5155
Diagnosis=2	Smoking0	74	13968.9 (7667.5-26470.8)		72	10730.4 (6229.0-25132.9)	0.9536
	Smoking1	25	12380.0 (6111.4-21489.7)		26	9670.6 (5232.1-19414.3)	0.4756
Diagnosis=3	Smoking0	185	13458.6 (9137.5-20468.8)		193	13764.2 (8628.1-21410.7)	0.9926
	Smoking1	59	15531.3 (11810.5-27630.5)		46	14500.4 (7378.3-24299.0)	0.6155
Diagnosis=4	Smoking0	23	14683.5 (12129.7-17261.0)		15	15257.2 (12580.4-19422.7)	0.3254
	Smoking1	7	14700.7 (11107.0-15721.6)		10	13029.8 (11764.5-15686.3)	0.3821
Diagnosis=5	Smoking0	40	21860.5 (9594.0-36148.6)		43	17319.1 (7565.8-37310.6)	0.9854
	Smoking1	22	15197.1 (8493.6-29252.1)		12	14077.6 (7629.5-21270.4)	0.2456
Diagnosis=6	Smoking0	53	19108.2 (7082.6-34409.5)		45	9842.7 (5226.4-20135.4)	0.08823
	Smoking1	35	20170.5 (9132.5-37948.0)		40	18689.1 (7569.5-34867.6)	0.4781
Diagnosis=1	Drinking0	553	13529.8 (6643.9-22166.8)		576	13764.5 (7822.9-22820.9)	0.6214
	Drinking1	402	14861.4 (9238.3-25751.3)		400	13944.2 (8136.6-25659.4)	0.4473
Diagnosis=2	Drinking0	75	13965.7 (8263.6-26262.2)		66	10412.1 (5517.7-25804.3)	0.9569
	Drinking1	24	12730.7 (4067.3-16671.2)		32	10017.0 (6849.3-19637.1)	0.4877
Diagnosis=3	Drinking0	172	13674.5 (9815.6-22699.5)		173	13184.7 (8401.5-20767.3)	0.9991
	Drinking1	72	14517.1 (11419.9-26373.1)		66	15344.8 (10557.6-25309.2)	0.6222
Diagnosis=4	Drinking0	23	14506.9 (11983.7-16744.1)		13	13951.9 (12230.3-19633.3)	0.2716
	Drinking1	7	15388.5 (12406.8-17135.4)		12	14453.3 (11894.7-15993.1)	0.6633
Diagnosis=5	Drinking0	38	19341.6 (7979.4-33801.1)		41	16837.3 (6064.5-36404.7)	0.8517
	Drinking1	24	19985.7 (11087.0-35739.5)		14	15666.2 (9649.4-37046.4)	0.5727
Diagnosis=6	Drinking0	56	18268.1 (6861.0-31788.3)		60	10714.5 (6157.8-28552.2)	0.3024
	Drinking1	32	30261.0 (11733.4-39278.3)		25	18062.2 (6067.1-31906.9)	0.171
Diagnosis=1	District0	346	12794.3 (7146.9-21694.2)		314	12138.0 (6955.0-19327.0)	0.3256
	District1	609	14550.7 (7566.2-25774.2)		662	14828.0 (8373.0-27158.0)	0.5487
Diagnosis=2	District0	30	14715.7 (9086.6-25823.0)		30	8197.0 (4473.0-28815.0)	0.8732
	District1	69	12380.0 (6111.4-21496.5)		68	11020.0 (6926.0-18654.0)	0.5769
Diagnosis=3	District0	73	15244.1 (7016.2-32008.7)		64	12897.0 (5760.0-27227.0)	0.3101
	District1	171	13615.1 (10568.0-20138.8)		175	13932.0 (10491.0-20613.0)	0.8716
Diagnosis=4	District0	5	25953.7 (25911.8-26631.0)		6	13801.0 (13590.0-15923.0)	0.814
	District1	25	14147.0 (10503.3-15503.0)		19	15257.0 (11197.0-18171.0)	0.1364
Diagnosis=5	District0	24	24527.5 (11745.3-36148.6)		14	15666.0 (6305.0-19697.0)	0.1387
	District1	38	18151.5 (7979.4-29872.6)		41	16667.0 (8106.0-37568.0)	0.59
Diagnosis=6	District0	31	21002.9 (7191.7-35002.1)		24	15754.0 (6889.0-23465.0)	0.254
	District1	57	18904.1 (11286.2-36401.1)		61	12034.0 (5313.0-30790.0)	0.1535
Diagnosis=1	Education1	81	15210.3 (6891.7-60455.2)		63	12144.0 (6710.0-23767.0)	0.06057
	Education2	346	14028.4 (7326.7-20278.7)		315	13021.0 (7814.0-20954.0)	0.6336
	Education3	290	13343.2 (7088.1-21403.9)		341	13109.0 (7512.0-23856.0)	0.4088
	Education4	140	14832.0 (7381.7-24367.6)		153	16759.0 (10009.0-27643.0)	0.6878
	Education5	98	14386.9 (9344.1-30722.1)		104	16443.0 (10977.0-27671.0)	0.6818
Diagnosis=2	Education1	9	15003.9 (12046.5-31457.1)		13	10852.0 (6951.0-29394.0)	0.3523
	Education2	36	12724.8 (6041.9-20918.6)		35	11511.0 (6375.0-29784.0)	0.309
	Education3	19	11793.3 (6243.5-20686.7)		28	10430.0 (5498.0-16233.0)	0.4935
	Education4	17	15611.4 (9099.4-25830.4)		10	8968.0 (7683.0-11330.0)	0.1025
	Education5	18	11110.4 (4183.1-31519.3)		12	7434.0 (5038.0-15370.0)	0.5176
Diagnosis=3	Education1	24	14716.9 (10265.4-32863.2)		23	15904.0 (9416.0-33136.0)	0.9686
	Education2	63	15358.5 (11362.7-34191.8)		69	14821.0 (8849.0-22399.0)	0.7817
	Education3	63	14934.4 (11216.1-23352.1)		66	12897.0 (6952.0-17296.0)	0.2961
	Education4	39	13906.2 (9131.5-16634.3)		39	13063.0 (10952.0-18405.0)	0.4059
	Education5	55	12045.2 (9756.2-16239.2)		42	12563.0 (9180.0-20690.0)	0.5018
Diagnosis=4	Education1	6	20297.7 (14281.1-26451.2)		2	16582.0 (15267.0-17897.0)	NA
	Education2	7	15388.5 (13792.5-21511.7)		4	13610.0 (12530.0-22621.0)	0.6949
	Education3	10	14533.5 (11168.5-16327.5)		8	14094.0 (12365.0-16717.0)	0.3497
	Education4	6	12801.1 (7534.2-14652.2)		5	15798.0 (15352.0-16337.0)	0.1744
	Education5	1	2294.6 (2294.6-2294.6)		6	11528.0 (9041.0-17790.0)	NA
Diagnosis=5	Education1	5	18974.9 (17328.0-20423.6)		6	13130.0 (7739.0-15318.0)	0.2669
	Education2	29	19708.2 (8030.3-37669.7)		11	19461.0 (10420.0-41599.0)	0.6398
	Education3	14	17831.6 (11733.4-27586.5)		19	16667.0 (6612.0-37311.0)	0.3041
	Education4	6	42919.1 (22311.5-58071.8)		6	16848.0 (15428.0-45609.0)	0.3809
	Education5	8	17790.0 (5903.8-27398.0)		13	16837.0 (5701.0-37027.0)	0.3669
Diagnosis=6	Education1	6	13183.9 (5878.4-39491.5)		7	7701.0 (4268.0-20320.0)	0.5266
	Education2	28	18481.7 (11848.5-36356.8)		21	20135.0 (7820.0-39236.0)	0.8024
	Education3	30	21712.8 (7941.5-37250.6)		20	13731.0 (5825.0-23465.0)	0.06477
	Education4	11	21002.9 (4204.4-23899.4)		21	15832.0 (7163.0-30997.0)	0.9838
	Education5	13	17828.2 (11094.9-33229.8)		16	8931.0 (5021.0-11551.0)	0.3205
Hypertension=0	Diabetes0	923	13535.6 (7283.9-25634.5)		942	13202.9 (7572.0-20831.5)	0.4253
	Diabetes1	84	14589.2 (7048.3-22610.2)		62	13001.4 (7449.3-27621.9)	0.1755
Hypertension=1	Diabetes0	358	15340.7 (9170.2-26016.3)		360	15151.0 (8599.9-27681.2)	0.5977
	Diabetes1	113	15107.7 (8504.0-30747.2)		114	14630.2 (7665.8-32600.6)	0.6189
Hypertension=0	Smoking0	635	13615.1 (7013.1-26298.6)		648	13080.1 (7536.3-21241.6)	0.1793
	Smoking1	372	13471.2 (7736.0-23433.0)		356	13358.5 (7878.4-21292.8)	0.6482
Hypertension=1	Smoking0	265	15107.7 (8954.2-28787.4)		275	15230.4 (8425.9-29506.4)	0.3143
	Smoking1	206	15561.3 (8777.8-24912.5)		199	15026.2 (8045.1-29510.6)	0.339
Hypertension=0	Drinking0	644	13258.2 (6691.7-24497.7)		649	13044.9 (7497.4-20723.2)	0.5895
	Drinking1	363	14685.4 (8759.0-25634.5)		355	13642.0 (8003.8-21417.7)	0.129
Hypertension=1	Drinking0	273	14927.2 (7906.6-23767.8)		280	14876.4 (8203.7-28539.0)	0.9048
	Drinking1	198	16264.3 (10610.9-33588.3)		194	15405.3 (8456.9-30438.5)	0.773
Hypertension=0	District0	367	13284.6 (7060.6-25730.8)		339	12132.4 (6253.6-19773.2)	0.09255
	District1	640	13800.0 (7394.8-24469.5)		665	13733.0 (8207.9-21914.5)	0.603
Hypertension=1	District0	142	15490.7 (7952.2-27137.3)		113	13583.7 (7084.0-25673.3)	0.3676
	District1	329	15145.3 (9769.1-26753.3)		361	15607.0 (8848.6-30996.7)	0.9651
Hypertension=0	Education1	83	14235.5 (7112.5-47874.3)		68	13015.4 (6738.2-22941.2)	0.08638
	Education2	306	13930.1 (6737.5-23058.1)		295	13842.1 (7898.0-21177.5)	0.913
	Education3	311	13529.8 (7176.1-22862.2)		339	12447.1 (6891.3-20303.4)	0.2757
	Education4	153	14344.7 (7440.5-21593.6)		164	14103.4 (8646.3-21956.6)	0.9567
	Education5	154	12507.6 (8155.4-26226.4)		138	13018.0 (8354.9-19418.3)	0.928
Hypertension=1	Education1	48	18203.6 (10107.8-53179.4)		46	13938.3 (7079.3-30943.5)	0.08532
	Education2	203	14494.9 (8585.4-25870.9)		160	13731.5 (7724.9-34932.4)	0.3736
	Education3	115	16137.4 (8227.5-22579.1)		143	15026.2 (8447.7-27668.8)	0.4031
	Education4	66	15258.1 (7567.1-25485.2)		70	17932.4 (11180.8-27150.8)	0.3385
	Education5	39	14731.0 (11401.0-27174.7)		55	16911.1 (11459.1-29008.6)	0.9577
Diabetes=0	Smoking0	796	13975.9 (7304.8-26998.3)		820	13837.7 (7805.9-22511.8)	0.6011
	Smoking1	485	14162.6 (8010.9-23428.0)		482	13443.3 (7960.4-22893.0)	0.7808
Diabetes=1	Smoking0	104	14897.1 (8342.3-25852.4)		103	13045.3 (7578.1-29338.1)	0.6362
	Smoking1	93	14735.7 (7962.4-25781.5)		73	15143.3 (7883.4-32516.1)	0.5048
Diabetes=0	Drinking0	798	13714.8 (6965.8-25303.1)		814	13460.0 (7565.4-22102.0)	0.3262
	Drinking1	483	14827.2 (9361.2-27443.8)		488	13952.5 (8336.7-25160.9)	0.143
Diabetes=1	Drinking0	119	14431.3 (7628.8-21108.9)		115	14446.6 (8012.5-32482.2)	0.1665
	Drinking1	78	15887.1 (9155.8-30722.2)		61	13813.6 (7195.8-29961.2)	0.6829
Diabetes=0	District0	456	13758.8 (7012.9-26098.5)		406	12227.1 (6555.9-20013.4)	0.1056
	District1	825	14105.3 (8125.1-25445.3)		896	14180.3 (8487.9-24120.2)	0.4553
Diabetes=1	District0	53	15065.0 (8758.3-23940.7)		46	11969.3 (6010.4-29735.9)	0.473
	District1	144	14795.8 (7725.2-26533.0)		130	14239.0 (7910.2-31949.3)	0.2591
Diabetes=0	Education1	110	15285.4 (7476.0-49108.5)		104	13936.4 (6911.1-29582.5)	0.08118
	Education2	428	13956.7 (7298.4-25621.4)		388	13787.9 (7848.7-21848.6)	0.9649
	Education3	380	14149.9 (7774.2-23662.5)		439	13108.7 (7362.8-23002.3)	0.1198
	Education4	189	15049.5 (8683.0-22811.6)		201	15352.1 (8980.9-22941.7)	0.9825
	Education5	174	12748.3 (8670.4-24746.4)		170	13549.7 (8354.9-22133.2)	0.994
Diabetes=1	Education1	21	13454.9 (8954.2-48232.3)		10	7122.5 (5051.0-9258.7)	0.01115
	Education2	81	15326.6 (10345.2-22904.2)		67	13813.6 (6850.0-46688.6)	0.9662
	Education3	46	12839.8 (7057.9-18678.2)		43	10637.2 (7330.7-24235.0)	0.3772
	Education4	30	13899.1 (6197.4-23711.6)		33	16986.6 (10633.5-27643.3)	0.3268
	Education5	19	24311.9 (13405.6-32309.6)		23	16517.0 (11264.3-35297.1)	0.8578
Smoking=0	Drinking0	771	13788.4 (7000.9-26049.4)		790	13284.7 (7686.7-22085.2)	0.3566
	Drinking1	129	15599.6 (12031.2-37669.7)		133	16634.8 (9247.5-30544.6)	0.07793
Smoking=1	Drinking0	146	13909.6 (7325.6-19825.6)		139	15143.3 (7350.5-31268.4)	0.3246
	Drinking1	432	14718.2 (8309.5-25690.9)		416	13194.9 (8071.5-23257.0)	0.7636
Smoking=0	District0	301	14196.5 (7484.7-29903.8)		269	12455.3 (6926.6-22078.8)	0.06135
	District1	599	14052.8 (7531.2-26230.0)		654	14121.4 (8211.5-23599.8)	0.3824
Smoking=1	District0	208	12234.2 (6818.8-23374.0)		183	11526.1 (6253.6-20268.7)	0.4561
	District1	370	14826.6 (9302.5-24415.4)		372	14553.9 (8696.7-27734.1)	0.5297
Smoking=0	Education1	105	15210.3 (8166.0-45712.0)		93	13924.8 (7049.3-31469.7)	0.1073
	Education2	276	14364.1 (6912.1-27486.1)		276	14472.0 (7589.0-22881.9)	0.8755
	Education3	233	13864.3 (7520.5-21902.8)		272	12505.4 (7392.7-19619.2)	0.1233
	Education4	134	13997.4 (7936.4-21894.2)		144	14896.5 (9140.2-22597.5)	0.909
	Education5	152	13518.7 (8417.1-28959.6)		138	13942.5 (8415.1-25012.9)	0.7282
Smoking=1	Education1	26	22418.4 (8099.1-59620.1)		21	9541.8 (6023.3-16923.3)	0.04239
	Education2	233	14162.6 (8631.0-22132.4)		179	12664.2 (8134.5-21719.7)	0.4792
	Education3	193	14371.9 (7886.2-23428.0)		210	14259.4 (7172.1-27612.2)	0.9441
	Education4	85	15531.3 (7358-24449.9)		90	16147.0 (10041.9-28797.7)	0.5989
	Education5	41	12069.5 (9592.3-21146.8)		55	12455.2 (8225.3-20210.9)	0.3286
Drinking=0	District0	307	13355.6 (6830.7-25895.7)		292	12282.8 (6153.2-21062.1)	0.299
	District1	610	13959.8 (7239.8-22342.0)		637	13876.9 (8207.2-23786.0)	0.9334
Drinking=1	District0	202	14544.2 (8065.5-27745.6)		160	12226.5 (6977.4-20950.8)	0.1018
	District1	359	14934.4 (10156.6-28114.8)		389	15026.2 (8878.8-26339.7)	0.6019
Drinking=0	Education1	102	15227.2 (7547.0-47044.3)		87	12995.3 (6996.0-29379.5)	0.04761
	Education2	291	13947.6 (6514.5-23471.1)		278	14254.2 (7558.1-25504.9)	0.08973
	Education3	248	13456.4 (7070.1-20381.8)		272	12451.2 (6953.7-19851.7)	0.35
	Education4	136	13963.8 (7250.1-21760.4)		154	14868.7 (8962.1-21993.1)	0.5784
	Education5	140	13637.3 (8915.1-27665.6)		138	13966.8 (8354.9-23574.6)	0.698
Drinking=1	Education1	29	15003.9 (9665.5-51336.8)		27	15607.0 (6525.0-22275.2)	0.07299
	Education2	218	15136.2 (9913.4-25553.0)		177	12986.3 (8138.8-21107.3)	0.3776
	Education3	178	15665.4 (8322.6-33115.6)		210	14259.4 (7547.6-27931.5)	0.3135
	Education4	83	15364.8 (10992.1-26615.5)		80	17091.7 (11341.4-30809.0)	0.9892
	Education5	53	12056.0 (9389.7-24158.6)		55	12261.3 (8818.0-21523.8)	0.3792
District=0	Education1	58	14634.0 (7373.5-52289.1)		55	10195.0 (6710.0-23552.0)	0.08126
	Education2	228	13900.6 (7232.2-25621.4)		167	12664.0 (7081.0-20525.0)	0.3271
	Education3	169	14194.5 (7901.0-24441.4)		164	11100.0 (6050.0-18678.0)	0.1449
	Education4	34	15361.5 (6292.2-23214.6)		54	15307.0 (6658.0-22082.0)	0.5017
	Education5	20	9632.3 (5573.7-23995.2)		12	21505.0 (16921.0-31565.0)	0.1097
District=1	Education1	73	15326.8 (9475.1-47218.8)		59	13948.0 (7000.0-31505.0)	0.1369
	Education2	281	14434.7 (7906.6-24874.0)		288	14377.0 (8238.0-25775.0)	0.3038
	Education3	257	14086.1 (7009.1-21504.0)		318	14054.0 (8115.0-25391.0)	0.5432
	Education4	185	14700.7 (7687.6-22260.6)		180	15726.0 (10639.0-25906.0)	0.7801
	Education5	173	13578.8 (9517.5-27057.7)		181	13315.0 (8207.0-22588.0)	0.686
Definition of subgroup labels: Sex: 1 [Male], 2 [Female]; Age: 1 [<51years], 2 [51-59years], 3 [60-67years], 4 [≥68years]; BMI 1 [<18.5], 2 [18.5-24], 3 [24-28], 4 [≥28]; Length of Stay (LOS): 1 [1-6 days], 2 [7-13 days], 3 [14-29 days], 4 [≥30 days]; Surgery: 0 [No], 1 [Yes]; Diagnosis: 1 [Benign tumor], 2 [Malignant tumor], 3 [Inflammation], 4 [Hernia], 5 [Intestinal obstruction], 6 [Others]; H…
p values are determined by T-test or Wilcoxon Rank Sum test.

## Sheet: TableS3
Table S3	Length of Stay (LOS) of patients by light sides of the hospital units across 616 plural subgroups.
Subgroups		Low Light Side			High Light Side		p-value
		N	median (Q1-Q3)		N	median (Q1-Q3)
Sex=1	Age1	170	6 (3-10)		180	6 (3-11.3)	0.3688
	Age2	194	6 (3-12)		202	6 (3-10.8)	0.4059
	Age3	257	5 (2-10)		262	5 (2-11.8)	0.2199
	Age4	268	7 (3-14)		229	7 (3-15)	0.392
Sex=2	Age1	171	6 (4-11)		178	6 (3-10)	0.09244
	Age2	164	7 (4-13)		159	6 (3-11)	0.1584
	Age3	108	6 (4-10.3)		114	7 (3.3-14)	0.1144
	Age4	146	9.5 (5-19)		154	9 (5-15)	0.1232
Sex=1	BMI1	92	4 (2-10)		109	6 (2-12)	0.3713
	BMI2	608	6 (2-12)		561	6 (3-12)	0.9275
	BMI3	162	7 (4-11)		168	7 (4-14)	0.2858
	BMI4	27	7 (4.5-14)		35	7 (4-15.5)	0.5264
Sex=2	BMI1	116	6 (3-13.5)		130	5 (2-10)	0.03131
	BMI2	359	7 (4-14)		357	7 (4-12)	0.495
	BMI3	93	7 (4-13)		95	7 (4-12)	0.8836
	BMI4	21	9 (7-14)		23	7 (6-11.5)	0.3919
Sex=1	LOS1	480	3 (2-4)		455	3 (2-4)	0.3401
	LOS2	223	9 (7.5-11)		220	9 (7-11)	0.2391
	LOS3	147	18 (15-22)		161	18 (15-22)	0.958
	LOS4	39	36 (31.5-42.5)		37	37 (33-45)	0.1602
Sex=2	LOS1	273	4 (2-5)		298	3 (2-5)	0.4573
	LOS2	163	9 (7-11)		185	9 (7-11)	0.3835
	LOS3	114	18 (15-21)		100	19 (15-23)	0.2802
	LOS4	39	36 (33-45.5)		22	42 (35.3-52)	0.4658
Sex=1	Surgery0	182	6 (3-10)		185	6 (3-9)	0.2539
	Surgery1	707	6 (2.5-13)		688	7 (3-13.3)	0.133
Sex=2	Surgery0	87	7 (4-12.5)		99	6 (3-10)	0.08712
	Surgery1	502	7 (4-14)		506	7 (4-12)	0.2107
Sex=1	Diagnosis1	624	4 (2-10)		623	5 (2-11)	0.1505
	Diagnosis2	40	8 (6-12)		38	8.5 (6-14.8)	0.28
	Diagnosis3	117	9 (6-14)		107	7 (5-13)	0.1602
	Diagnosis4	20	7 (5-9.3)		20	7 (6-10)	0.5058
	Diagnosis5	31	7 (6-10)		27	7 (6-12)	0.7014
	Diagnosis6	57	10 (7-18)		58	9 (6-15)	0.6349
Sex=2	Diagnosis1	331	6 (3-14)		353	5 (2-11)	0.1002
	Diagnosis2	59	8 (5.5-13)		60	7 (4-13.3)	0.9881
	Diagnosis3	127	7 (5-12)		132	8 (5-12)	0.2263
	Diagnosis4	10	7.5 (7-10.8)		5	8 (8-9)	0.5852
	Diagnosis5	31	11 (7-21)		28	10 (7-16.5)	0.2388
	Diagnosis6	31	9 (6.5-17)		27	8 (6-15)	0.4119
Sex=1	Hypertension0	584	6 (3-12)		563	6 (3-12)	0.5731
	Hypertension1	305	5 (2-11)		310	7 (3-14)	0.3863
Sex=2	Hypertension0	423	6 (4-12)		441	6 (3-11)	0.2719
	Hypertension1	166	8 (5-17)		164	9 (5-14)	0.1014
Sex=1	Diabetes0	752	6 (3-12)		756	6 (3-12.3)	0.6482
	Diabetes1	137	4 (2-10)		117	6 (3-13)	0.1364
Sex=2	Diabetes0	529	7 (4-14)		546	6 (3-11)	0.04393
	Diabetes1	60	7.5 (4-14)		59	9 (5-14)	0.7718
Sex=1	Smoking0	320	7 (3-12)		322	7 (4-13)	0.467
	Smoking1	569	5 (2-12)		551	6 (2-12)	0.4979
Sex=2	Smoking0	580	7 (4-14)		601	7 (4-11)	0.06327
	Smoking1	9	7 (5-8)		4	11 (6.5-14.5)	0.9272
Sex=1	Drinking0	368	6 (3-11)		371	7 (3-13)	0.01755
	Drinking1	521	6 (2-13)		502	6 (2-12)	0.5768
Sex=2	Drinking0	549	7 (4-14)		558	6 (3-11)	0.1603
	Drinking1	40	8 (5-17.3)		47	8 (4-15)	0.1477
Sex=1	District0	305	5 (2-11)		256	6 (3-10.3)	0.7186
	District1	584	6 (3-12)		617	6 (3-13)	0.2298
Sex=2	District0	204	7 (4-15)		196	6 (3-11)	0.01726
	District1	385	7 (4-13)		409	7 (4-12)	0.4562
Sex=1	Education1	41	11 (4-20)		36	6 (3-10.8)	0.08205
	Education2	319	5 (2-11)		254	6 (2.3-13)	0.06312
	Education3	278	6 (3-11)		314	5.5 (2-11)	0.3518
	Education4	135	6 (3-12)		148	7 (4-13)	0.2269
	Education5	116	7 (3.8-12)		121	7 (3-14)	0.4123
Sex=2	Education1	90	9.5 (5-18)		78	7 (4-14)	0.03165
	Education2	190	7 (4-14)		201	7 (4-13)	0.7964
	Education3	148	6 (3-10)		168	6 (3-10)	0.3961
	Education4	84	6 (4-14)		86	5 (3-11)	0.1366
	Education5	77	7 (5-13)		72	7 (5-11)	0.8758
Age=1	BMI1	48	4.5 (2-7)		67	5 (3-12)	0.9047
	BMI2	207	6 (3-10)		223	6 (3-9)	0.5199
	BMI3	72	8 (5-11)		51	6 (4-11.5)	0.3785
	BMI4	14	7.5 (4.3-12.8)		17	5 (2-9)	0.5354
Age=2	BMI1	55	4 (2-13)		53	3 (2-7)	0.2045
	BMI2	221	7 (3-13)		214	6 (3-10)	0.1734
	BMI3	62	6 (4-10.8)		76	7 (3-11.3)	0.4728
	BMI4	20	7 (5.8-14.3)		18	7 (6-14.8)	0.9
Age=3	BMI1	41	5 (3-11)		59	4 (2-8.5)	0.7735
	BMI2	259	5 (2-10)		225	5 (2-12)	0.2412
	BMI3	60	7 (3-10)		75	7 (4-14)	0.1117
	BMI4	5	18 (17-19)		17	10 (6-15)	0.4682
Age=4	BMI1	64	6 (4-13.5)		60	6 (3-12)	0.3988
	BMI2	280	7 (3-16.3)		256	8 (4-15)	0.8222
	BMI3	61	9 (3-18)		61	9 (6-16)	0.8385
	BMI4	9	11 (6-13)		6	12 (7.8-15.5)	0.3706
Age=1	LOS1	180	4 (2-5)		198	3 (2-5)	0.524
	LOS2	99	9 (7-10.5)		101	9 (7-11)	0.8445
	LOS3	47	16 (14-19)		47	18 (15-21)	0.08161
	LOS4	15	37 (33-41.5)		12	36 (33.8-38)	0.3214
Age=2	LOS1	176	3 (2-4)		201	3 (2-4)	0.4567
	LOS2	103	9 (7-10)		98	9 (7-11)	0.9574
	LOS3	59	17 (15-21)		52	17 (15-20)	0.4724
	LOS4	20	36 (32.8-42)		10	40.5 (34.8-58.5)	0.1997
Age=3	LOS1	212	3 (2-5)		198	3 (2-4)	0.9937
	LOS2	86	9 (8-11)		90	8 (7-10)	0.1743
	LOS3	54	18.5 (15.3-21)		70	19 (15-22)	0.8923
	LOS4	13	35 (31-44)		18	42 (35.5-51)	0.1371
Age=4	LOS1	185	3 (2-5)		156	3 (2-5)	0.5806
	LOS2	98	9 (7-11)		116	9 (8-11)	0.8621
	LOS3	101	18 (16-23)		92	20 (16-22)	0.5534
	LOS4	30	36 (34.3-48.3)		19	41 (32-49)	0.8461
Age=1	Surgery0	56	5.5 (3-10)		58	5.5 (3-10)	0.3609
	Surgery1	285	6 (4-11)		300	6 (3-11)	0.6775
Age=2	Surgery0	56	7 (4-10)		65	5 (3-8)	0.1884
	Surgery1	302	7 (3-13)		296	6 (3-11)	0.245
Age=3	Surgery0	61	5 (2-9)		75	5 (2-8)	0.4287
	Surgery1	304	5 (2-11)		301	6 (3-14)	0.06458
Age=4	Surgery0	96	7 (3-13)		86	6.5 (4.3-10.8)	0.8421
	Surgery1	318	8 (4-17)		297	9 (4-16)	0.8115
Age=1	Diagnosis1	165	5 (2-9)		201	5 (2-10)	0.5584
	Diagnosis2	34	8 (4.3-11.8)		24	7 (4-11.3)	0.6432
	Diagnosis3	100	7 (5-11)		77	6 (4-9)	0.7327
	Diagnosis4	5	5 (5-6)		6	7 (5.3-10.3)	0.2837
	Diagnosis5	14	9.5 (6-19.3)		17	10 (7-15)	0.7597
	Diagnosis6	23	10 (6-15.5)		33	7 (6-13)	0.4096
Age=2	Diagnosis1	246	5 (2-10)		262	5 (3-9)	0.2489
	Diagnosis2	27	7 (5.5-10.5)		24	6 (4-11)	0.4666
	Diagnosis3	44	8.5 (6-13.3)		45	8 (5-14)	0.7399
	Diagnosis4	7	7 (5-8.5)		2	8.5 (7.8-9.3)	NA
	Diagnosis5	18	9.5 (7-22)		12	9 (7-12.3)	0.06936
	Diagnosis6	16	18 (8.8-23)		16	8.5 (5.8-13.5)	0.03524
Age=3	Diagnosis1	276	4 (2-10)		277	5 (2-10)	0.08585
	Diagnosis2	16	9 (7-12.3)		20	11 (7-15)	0.868
	Diagnosis3	38	7 (5-11.8)		49	9 (5-13)	0.9171
	Diagnosis4	7	8 (7-10.5)		5	7 (7-7)	0.1584
	Diagnosis5	7	9 (8-17)		10	9.5 (6.3-19)	0.9278
	Diagnosis6	21	9 (7-10)		15	8 (7-16.5)	0.3582
Age=4	Diagnosis1	268	6 (2-17)		236	7 (3-15)	0.4653
	Diagnosis2	22	8.5 (6-14)		30	7 (6-15.5)	0.7375
	Diagnosis3	62	11 (6-16)		68	9 (7-13.3)	0.7095
	Diagnosis4	11	9 (7-11)		12	8.5 (6-10.5)	0.6699
	Diagnosis5	23	7 (6-16)		16	7 (5.8-21.5)	0.5511
	Diagnosis6	28	9.5 (6-17.3)		21	11 (8-19)	0.5352
Age=1	Hypertension0	314	6 (3-11)		332	6 (3-10)	0.3608
	Hypertension1	27	7 (3.5-10.5)		26	5.5 (2-12)	0.8723
Age=2	Hypertension0	257	6 (3-13)		268	6 (3-11)	0.6504
	Hypertension1	101	7 (3-10)		93	6 (3-8)	0.1527
Age=3	Hypertension0	232	5 (2-11)		225	6 (3-12)	0.1382
	Hypertension1	133	5 (2-10)		151	6 (2-14)	0.2858
Age=4	Hypertension0	204	7 (3.8-16.3)		179	7 (3-13)	0.5894
	Hypertension1	210	7 (4-16)		204	9.5 (5-16)	0.8771
Age=1	Diabetes0	328	6 (3-10.3)		350	6 (3-10)	0.3547
	Diabetes1	13	8 (4-13)		8	5.5 (4.5-19.8)	0.5829
Age=2	Diabetes0	307	7 (3-13)		307	6 (3-11)	0.1376
	Diabetes1	51	4 (3-7.5)		54	6 (2-8)	0.7056
Age=3	Diabetes0	308	5 (2-11)		331	6 (3-13)	0.1464
	Diabetes1	57	5 (2-10)		45	4 (2-19)	0.1985
Age=4	Diabetes0	338	7 (4-17)		314	8 (4-15)	0.346
	Diabetes1	76	6.5 (3-15)		69	9 (5-16)	0.2294
Age=1	Smoking0	250	6 (4-11)		266	6 (3-10)	0.09677
	Smoking1	91	5 (3-9)		92	6 (3-11.3)	0.1489
Age=2	Smoking0	228	7 (4-12.3)		218	6 (3-11)	0.1311
	Smoking1	130	6 (2.3-12)		143	5 (3-10.5)	0.5541
Age=3	Smoking0	178	6 (3-11)		191	7 (3-13)	0.2458
	Smoking1	187	5 (2-10)		185	5 (2-11)	0.4213
Age=4	Smoking0	244	8 (4-18)		248	9 (5-15)	0.4171
	Smoking1	170	6.5 (2.3-14)		135	7 (3-15.5)	0.8823
Age=1	Drinking0	242	6 (4-11)		266	6 (3-10)	0.2182
	Drinking1	99	6 (3-9.5)		92	7 (2.8-12.3)	0.6109
Age=2	Drinking0	230	6 (3-12)		222	6 (3-11)	0.4218
	Drinking1	128	7 (3-13)		139	6 (3-10.5)	0.1184
Age=3	Drinking0	196	6 (3-10.3)		192	7 (3-13.3)	0.123
	Drinking1	169	5 (2-10)		184	5 (2-11.3)	0.2693
Age=4	Drinking0	249	7 (4-16)		249	9 (5-16)	0.3462
	Drinking1	165	7 (3-16)		134	6.5 (3-14)	0.05838
Age=1	District0	100	6 (4-10.3)		120	6 (3-10)	0.247
	District1	241	6 (3-11)		238	6 (3-11)	0.7448
Age=2	District0	119	7 (3-14)		127	5 (3-9)	0.004052
	District1	239	6 (3-10.5)		234	6 (3-11)	0.8831
Age=3	District0	157	5 (2-9)		110	4 (2-11)	0.3833
	District1	208	6 (2-12)		266	6 (3-13)	0.2262
Age=4	District0	133	8 (4-16)		95	8 (4-16)	0.6648
	District1	281	7 (3-16)		288	8 (4-15)	0.7333
Age=1	Education1	2	22 (14-30)		4	12 (4.3-21)	NA
	Education2	40	7 (4-13)		49	6 (3-11)	0.3362
	Education3	118	6 (3-9)		139	5 (3-9)	0.9509
	Education4	60	6 (3-13.3)		75	7 (4-11.5)	0.458
	Education5	121	7 (4-11)		91	6 (4-11.5)	0.9745
Age=2	Education1	23	7 (4-11.5)		17	3 (3-6)	0.1154
	Education2	100	6 (3-12)		97	6 (3-10)	0.8645
	Education3	127	7 (3-13)		137	6 (3-11)	0.2008
	Education4	78	7 (3-13)		77	6 (4-11)	0.4557
	Education5	30	7 (3.3-11.8)		33	5 (2-9)	0.2269
Age=3	Education1	45	7 (4-14)		34	7 (3.3-13)	0.7246
	Education2	172	5 (2-10.3)		159	6 (3-13)	0.05471
	Education3	98	5 (2-9.8)		117	5 (2-11)	0.7619
	Education4	36	5.5 (2-8)		39	6 (4-12.5)	0.3754
	Education5	14	5.5 (4-14.8)		27	7 (4.5-13.5)	0.7998
Age=4	Education1	61	15 (7-21)		59	8 (5.5-14)	0.003481
	Education2	197	6 (2-14)		150	8 (4-16)	0.459
	Education3	83	7 (3-13.5)		89	7 (3-13)	0.2462
	Education4	45	6 (4-14)		43	9 (3-14)	0.5195
	Education5	28	9 (6-17.3)		42	10.5 (6-20.5)	0.4016
BMI=1	LOS1	124	3 (2-5)		143	3 (1-4)	0.3824
	LOS2	38	8.5 (7-11)		49	9 (8-11)	0.8375
	LOS3	30	19 (17-21.8)		32	18.5 (14-22.3)	0.4407
	LOS4	16	43 (36.8-57)		15	38 (31.5-43)	0.2166
BMI=2	LOS1	501	3 (2-5)		476	3 (2-5)	0.2266
	LOS2	240	9 (7-11)		253	9 (7-11)	0.8828
	LOS3	174	18 (15-21)		156	19 (16-22.3)	0.1131
	LOS4	52	35 (31.8-42.3)		33	39 (34-52)	0.07509
BMI=3	LOS1	112	3 (2-5)		111	3 (2-5)	0.9296
	LOS2	91	9 (8-11)		86	9 (7-11)	0.6799
	LOS3	44	18 (15-22.3)		59	18 (15-21)	0.4647
	LOS4	8	35 (33-38.5)		7	43 (35-71.5)	0.2006
BMI=4	LOS1	16	4.5 (2.8-6)		23	4 (1.5-5.5)	0.2195
	LOS2	17	9 (7-11)		17	8 (7-10)	0.5635
	LOS3	13	17 (14-18)		14	16 (15-19.3)	0.9048
	LOS4	2	40 (35-45)		4	38 (34-47)	NA
BMI=1	Surgery0	175	5 (2-10)		193	5 (2-11)	0.8198
	Surgery1	33	8 (4-17)		46	6 (3-10)	0.04112
BMI=2	Surgery0	789	6 (3-14)		729	7 (3-13)	0.9246
	Surgery1	178	6 (2.3-10)		189	6 (3-8)	0.1934
BMI=3	Surgery0	205	8 (4-13)		222	7 (4-14)	0.5161
	Surgery1	50	5.5 (3-10)		41	7 (3-9)	0.5075
BMI=4	Surgery0	40	9 (6-15.3)		50	7 (4.3-15.8)	0.9768
	Surgery1	8	7 (6.5-12.3)		8	8 (4-10.8)	0.9014
BMI=1	Diagnosis1	162	4 (2-7)		180	4 (2-9.3)	0.8715
	Diagnosis2	4	5.5 (3.8-11)		6	11 (7-13.5)	0.9153
	Diagnosis3	13	10 (7-19)		20	5.5 (3.8-8.5)	0.1258
	Diagnosis4	1	8 (8-8)		0	NA	NA
	Diagnosis5	19	17 (10.5-24)		20	9.5 (6.8-14.5)	0.1117
	Diagnosis6	10	10 (6.3-18)		12	7 (3.8-16)	0.6828
BMI=2	Diagnosis1	624	5 (2-12)		605	5 (2-11)	0.5551
	Diagnosis2	68	8 (5-12.3)		68	7 (5-15)	0.5166
	Diagnosis3	163	7 (5-13)		144	7 (5.8-12)	0.7782
	Diagnosis4	18	7 (5-10.8)		17	8 (6-11)	0.3207
	Diagnosis5	36	7 (6-10)		33	7 (6-13)	0.6628
	Diagnosis6	58	12 (8-18.8)		51	9 (6-14.5)	0.1753
BMI=3	Diagnosis1	143	6 (2-13)		155	7 (3-12.5)	0.8449
	Diagnosis2	23	8 (6.5-11)		18	7.5 (4.5-9)	0.8944
	Diagnosis3	54	7.5 (6-11)		61	10 (6-14)	0.1117
	Diagnosis4	11	7 (7-9)		7	7 (5.5-7.5)	0.2011
	Diagnosis5	7	7 (5-17)		2	29 (25-33)	0.2501
	Diagnosis6	17	9 (6-10)		20	8.5 (6-17)	0.2231
BMI=4	Diagnosis1	26	7 (5-14.8)		36	7 (2-16.3)	0.8197
	Diagnosis2	4	7.5 (6.8-10)		6	13 (8.3-15.5)	0.4857
	Diagnosis3	14	10.5 (8.3-14)		14	7 (6-9.8)	0.04281
	Diagnosis4	0	NA		0	NA	NA
	Diagnosis5	0	NA		1	2 (2-2)	NA
	Diagnosis6	3	6 (5-9.5)		2	15 (15-15)	0.115
BMI=1	Hypertension0	170	5 (2-12)		187	5 (2-10)	0.5756
	Hypertension1	38	7 (3.3-14)		52	5.5 (2-12)	0.211
BMI=2	Hypertension0	675	6 (3-12)		645	6 (3-11)	0.769
	Hypertension1	292	6 (3-14)		273	7 (3-13)	0.687
BMI=3	Hypertension0	138	8 (4-12)		142	7 (4-12)	0.9363
	Hypertension1	117	7 (3-12)		121	7 (4-14)	0.1903
BMI=4	Hypertension0	24	7 (4.8-11.3)		30	7 (4.3-14.8)	0.284
	Hypertension1	24	12 (6-17.3)		28	8 (4-14.3)	0.5459
BMI=1	Diabetes0	189	5 (2-12)		220	5 (2-10)	0.1595
	Diabetes1	19	3 (2-12)		19	8 (3-17)	0.3607
BMI=2	Diabetes0	837	6 (3-13)		811	6 (3-11)	0.2825
	Diabetes1	130	5 (2-10)		107	7 (3-13)	0.1326
BMI=3	Diabetes0	214	7 (4-11.8)		222	7 (4-13.8)	0.3107
	Diabetes1	41	8 (3-13)		41	8 (4-13)	0.9673
BMI=4	Diabetes0	41	9 (6-14)		49	9 (5-15)	0.6851
	Diabetes1	7	7 (5.5-14)		9	6 (4-7)	0.3689
BMI=1	Smoking0	140	6 (3-13)		164	5 (2-11)	0.07547
	Smoking1	68	4 (2-12)		75	5 (2-10)	0.5889
BMI=2	Smoking0	570	7 (4-14)		561	7 (4-12)	0.5253
	Smoking1	397	5 (2-11)		357	5 (2-11)	0.9617
BMI=3	Smoking0	156	7 (4-12)		158	7 (4-12)	0.6579
	Smoking1	99	7 (3-12)		105	7 (3-14)	0.3545
BMI=4	Smoking0	34	9 (6.3-14)		40	7 (4.8-14.3)	0.8682
	Smoking1	14	6.5 (4-16.3)		18	8 (4-14.8)	0.8847
BMI=1	Drinking0	150	5 (2-9.8)		165	5 (2-10)	0.3886
	Drinking1	58	5 (2-17)		74	6 (2-14)	0.3795
BMI=2	Drinking0	577	6 (3-13)		563	7 (4-12)	0.7405
	Drinking1	390	6 (2-13)		355	6 (2-11)	0.2104
BMI=3	Drinking0	160	7 (4-12)		162	7 (4-12)	0.5124
	Drinking1	95	7 (4-12)		101	8 (3-14)	0.5042
BMI=4	Drinking0	30	8.5 (6-13.8)		39	8 (5.5-14.5)	0.6784
	Drinking1	18	9.5 (4.3-16.3)		19	7 (4-15)	0.5531
BMI=1	District0	126	6 (3-17)		149	6 (3-13)	0.2353
	District1	82	4 (2-7)		90	3 (2-7)	0.6968
BMI=2	District0	643	6 (3-12)		648	6 (3-11.3)	0.851
	District1	324	7 (3-13)		270	6 (3-12)	0.2149
BMI=3	District0	172	7 (4-11)		182	7 (4-14)	0.06604
	District1	83	8 (4-14.5)		81	7 (4-11)	0.1473
BMI=4	District0	28	9 (5.8-14.5)		47	7 (6-14.5)	0.8235
	District1	20	7 (6-14)		11	4 (2-14)	0.594
BMI=1	Education1	24	6.5 (4-13.5)		21	5 (3-8)	0.1413
	Education2	68	5 (2-12)		77	5 (2-9)	0.7101
	Education3	61	5 (2-9)		75	4 (2-10)	0.3292
	Education4	32	6 (2.8-13.8)		38	5 (2-12.8)	0.2894
	Education5	23	4 (2-9)		28	9.5 (3.8-14.5)	0.3541
BMI=2	Education1	81	12 (7-20)		68	7.5 (4-14)	0.009291
	Education2	355	5 (2-12)		284	7 (3-13)	0.2193
	Education3	263	6 (3-10)		308	5 (2.8-10)	0.4087
	Education4	136	6 (2-13)		138	6 (4-11)	0.8041
	Education5	132	7 (4-13)		120	7 (4-13)	0.7944
BMI=3	Education1	21	7 (4-18)		21	8 (3-14)	0.7149
	Education2	74	8 (3-13)		79	9 (4-15)	0.2486
	Education3	83	6 (4-10)		81	7 (3-12)	0.7304
	Education4	46	7 (4-11.5)		45	7 (5-11)	0.8218
	Education5	31	9 (6-11)		37	7 (4-13)	0.8308
BMI=4	Education1	5	7 (7-9)		4	8 (3.5-12.5)	0.7488
	Education2	12	7 (6-11.3)		15	4 (2-11.5)	0.6244
	Education3	19	13 (5-17.5)		18	9.5 (4.3-13.8)	0.3322
	Education4	5	14 (11-16)		13	16 (7-17)	0.8323
	Education5	7	5 (4-7.5)		8	7 (6-7.3)	0.4362
LOS=1	Surgery0	141	3 (2-5)		162	3 (2-5)	0.5419
	Surgery1	612	3 (2-5)		591	3 (2-5)	0.9109
LOS=2	Surgery0	86	9 (7-11)		84	9 (7-10.3)	0.4606
	Surgery1	300	9 (7-11)		321	9 (7-11)	0.9915
LOS=3	Surgery0	31	18 (15-21)		34	17 (15-19.8)	0.645
	Surgery1	230	18 (15-21)		227	19 (15-22)	0.3431
LOS=4	Surgery0	11	36 (35.5-56.5)		4	33.5 (31.5-39.3)	0.1918
	Surgery1	67	36 (32-43.5)		55	38 (34-50)	0.08711
LOS=1	Diagnosis1	577	2 (2-4)		575	3 (2-4)	0.4725
	Diagnosis2	31	4 (3-5)		39	4 (3-6)	0.7347
	Diagnosis3	97	5 (3-6)		89	4 (3-6)	0.5167
	Diagnosis4	10	5 (5-5)		9	6 (4-6)	0.861
	Diagnosis5	17	5 (4-6)		16	5 (4-6)	0.6564
	Diagnosis6	21	5 (4-5)		25	4 (3-6)	0.4084
LOS=2	Diagnosis1	168	9 (7-11)		202	9 (7-11)	0.8546
	Diagnosis2	50	8.5 (7-11)		33	9 (7-11)	0.4792
	Diagnosis3	88	9 (8-11)		100	9 (7-11)	0.5548
	Diagnosis4	19	9 (7-11)		13	8 (7-10)	0.5739
	Diagnosis5	25	8 (7-10)		24	9 (7-11.3)	0.2804
	Diagnosis6	36	9 (8-10.3)		33	8 (8-11)	0.5679
LOS=3	Diagnosis1	156	18 (15-22.3)		159	19 (16-22)	0.6186
	Diagnosis2	16	17 (15-19.3)		22	16 (15-18)	0.4425
	Diagnosis3	49	16 (14-19)		43	16 (14.5-19)	0.5215
	Diagnosis4	1	14 (14-14)		3	19 (17.5-23.5)	NA
	Diagnosis5	12	19.5 (17-21)		11	23 (18-24.5)	0.2172
	Diagnosis6	27	18 (17.5-23)		23	19 (15-21.5)	0.7604
LOS=4	Diagnosis1	54	36.5 (33-43.8)		40	37.5 (33.8-52)	0.5315
	Diagnosis2	2	33 (32-34)		4	48.5 (39.8-55.3)	NA
	Diagnosis3	10	34 (32.3-38.5)		7	43 (37-71.5)	0.2142
	Diagnosis4	0	NA		0	NA	NA
	Diagnosis5	8	39 (33-42.8)		4	37.5 (35.5-39.8)	0.5824
	Diagnosis6	4	45 (41.5-45.3)		4	37.5 (35.8-38.3)	0.2494
LOS=1	Hypertension0	524	3 (2-5)		538	3 (2-5)	0.6699
	Hypertension1	229	3 (2-5)		215	3 (1-5)	0.9819
LOS=2	Hypertension0	261	9 (7-11)		271	9 (7-11)	0.6355
	Hypertension1	125	9 (7-11)		134	9 (7-11)	0.9524
LOS=3	Hypertension0	173	18 (15-21)		154	18.5 (16-22)	0.128
	Hypertension1	88	18 (15.8-22.3)		107	18 (15-21)	0.4263
LOS=4	Hypertension0	49	37 (33-44)		41	38 (34-52)	0.1184
	Hypertension1	29	36 (33-49)		18	38 (32.3-44.5)	0.9721
LOS=1	Diabetes0	643	3 (2-5)		669	3 (2-5)	0.8844
	Diabetes1	110	3 (2-4)		84	3 (1.8-4.3)	0.659
LOS=2	Diabetes0	341	9 (7-11)		358	9 (7-11)	0.9787
	Diabetes1	45	9 (8-11)		47	9 (7-10.5)	0.2299
LOS=3	Diabetes0	228	18 (15-21)		227	18 (15-21.5)	0.8896
	Diabetes1	33	18 (15-20)		34	20 (16-23.8)	0.05078
LOS=4	Diabetes0	69	36 (33-45)		48	40 (34-54.8)	0.1069
	Diabetes1	9	36 (35-41)		11	32 (31.5-36.5)	0.2349
LOS=1	Smoking0	428	4 (2-5)		451	3 (2-5)	0.7767
	Smoking1	325	3 (2-4)		302	3 (2-4)	0.469
LOS=2	Smoking0	251	9 (7-11)		280	9 (7-11)	0.5054
	Smoking1	135	9 (8-11)		125	9 (7-10)	0.1113
LOS=3	Smoking0	171	18 (15-21)		158	19 (15-22)	0.08259
	Smoking1	90	18 (15.3-22.8)		103	17 (15-20.5)	0.2683
LOS=4	Smoking0	50	36 (33-45)		34	38 (34-52)	0.4758
	Smoking1	28	36.5 (30.8-42.3)		25	38 (33-43)	0.2178
LOS=1	Drinking0	465	3 (2-5)		461	3 (2-5)	0.806
	Drinking1	288	3 (2-4)		292	3 (2-4)	0.7239
LOS=2	Drinking0	244	9 (7-11)		275	9 (7-11)	0.6672
	Drinking1	142	9 (7-11)		130	9 (7-11)	0.266
LOS=3	Drinking0	165	18 (15-21)		159	19 (16-22.5)	0.04626
	Drinking1	96	18 (15-21.3)		102	17 (15-20)	0.1283
LOS=4	Drinking0	43	37 (34-45)		34	41.5 (34.3-56.3)	0.09985
	Drinking1	35	36 (31-43.5)		25	37 (33-43)	0.9551
LOS=1	District0	258	3 (2-5)		244	3 (2-4)	0.8008
	District1	495	3 (2-5)		509	3 (2-5)	0.782
LOS=2	District0	134	9 (7-11)		120	9 (7-11)	0.4177
	District1	252	9 (7-11)		285	9 (7-11)	0.8974
LOS=3	District0	93	18 (16-21)		79	18 (15.5-22)	0.5835
	District1	168	18 (15-21)		182	18 (15-22)	0.6123
LOS=4	District0	24	35.5 (33-45)		9	34 (32-38)	0.7087
	District1	54	36.5 (33-43.8)		50	39 (34-52)	0.2593
LOS=1	Education1	42	4 (2-5)		54	3.5 (2-5)	0.7199
	Education2	277	3 (2-5)		224	3 (2-5)	0.2383
	Education3	229	3 (2-5)		275	3 (2-4)	0.4337
	Education4	114	3 (2-5)		112	4 (2-5)	0.4819
	Education5	91	4 (2-5)		88	3.5 (2-5)	0.4263
LOS=2	Education1	37	9 (7-11)		31	10 (8-11.5)	0.2707
	Education2	119	9 (7-11)		122	9 (8-10)	0.25
	Education3	114	9 (7-10)		119	9 (7-11)	0.4408
	Education4	56	9 (7-11.3)		73	9 (7-11)	0.7225
	Education5	60	9 (7-11)		60	8.5 (7-11)	0.6586
LOS=3	Education1	40	19 (16-21)		27	17 (15-22.5)	NA
	Education2	92	18 (15.8-21.3)		89	19 (15-22)	0.9756
	Education3	58	17.5 (15-21.8)		71	19 (16.5-22)	0.6129
	Education4	40	17 (14.8-20)		40	17 (15-21)	0.7895
	Education5	31	17 (15-19.5)		34	17 (15-21.8)	0.7398
LOS=4	Education1	12	36.5 (34.5-39)		2	37 (36.5-37.5)	0.6567
	Education2	21	36 (33-46)		20	44 (33.8-58.3)	0.285
	Education3	25	36 (32-45)		17	35 (33-45)	0.9461
	Education4	9	41 (35-53)		9	37 (34-42)	0.3784
	Education5	11	34 (32.5-37.5)		11	39 (35-50)	0.1005
Surgery=0	Diagnosis1	146	4 (2-8)		157	4 (2-7)	0.3557
	Diagnosis2	17	7 (3-8)		25	7 (6-12)	0.1744
	Diagnosis3	50	8.5 (5.3-12.8)		49	7 (5-11)	0.4731
	Diagnosis4	2	5 (5-5)		1	3 (3-3)	NA
	Diagnosis5	29	8 (7-11)		25	7 (6-9)	0.0606
	Diagnosis6	25	9 (4-13)		27	8 (6.5-14.5)	0.2928
Surgery=1	Diagnosis1	809	5 (2-12)		819	5 (2-12)	0.7706
	Diagnosis2	82	8 (6-13)		73	7 (5-14)	0.5888
	Diagnosis3	194	8 (5-14)		190	7 (5-13)	0.7736
	Diagnosis4	28	7 (6-10.3)		24	7.5 (6-10)	0.4144
	Diagnosis5	33	10 (6-20)		30	12.5 (7-23)	0.6563
	Diagnosis6	63	12 (7-18.5)		58	9 (6-16.5)	0.1802
Surgery=0	Hypertension0	166	6 (3-10)		185	6 (3-9)	0.08359
	Hypertension1	103	6 (3-11)		99	6 (3-10)	0.3498
Surgery=1	Hypertension0	841	6 (3-13)		819	6 (3-12)	0.6487
	Hypertension1	368	7 (3-14)		375	7 (3-14)	0.8064
Surgery=0	Diabetes0	214	7 (3-11)		246	6 (3-9)	0.116
	Diabetes1	55	4 (3-9)		38	6 (4-10.5)	0.7432
Surgery=1	Diabetes0	1067	6 (3-13)		1056	6.5 (3-13)	0.8632
	Diabetes1	142	6 (2-12.8)		138	7 (3-14.8)	0.1967
Surgery=0	Smoking0	159	6 (3-10.5)		166	6 (3-10)	0.234
	Smoking1	110	5.5 (3-10.8)		118	6 (3-9)	0.0855
Surgery=1	Smoking0	741	7 (4-14)		757	7 (4-13)	0.397
	Smoking1	468	5 (2-12)		437	6 (2-14)	0.1555
Surgery=0	Drinking0	163	6 (3-10)		168	6 (3-10)	0.2777
	Drinking1	106	6.5 (3-12)		116	5 (3-9)	0.05568
Surgery=1	Drinking0	754	6.5 (4-13)		761	7 (3-13)	0.4947
	Drinking1	455	6 (2-13.5)		433	6 (3-14)	0.6723
Surgery=0	District0	89	6 (4-9)		88	6 (2.8-9)	0.2721
	District1	180	6 (3-11)		196	6 (3-9.3)	0.6
Surgery=1	District0	420	6 (3-14)		364	6 (3-11)	0.3759
	District1	789	6 (3-13)		830	7 (3-13)	0.2799
Surgery=0	Education1	20	7.5 (5.5-13.5)		26	6 (4-7)	0.05409
	Education2	111	6 (3-9)		95	7 (3-9)	0.3991
	Education3	67	4 (2-8)		90	4.5 (2.3-7)	0.5237
	Education4	38	7 (4-12.8)		37	5 (2-8)	0.06265
	Education5	33	8 (6-13)		36	6.5 (4-11.3)	0.3163
Surgery=1	Education1	111	11 (5-19)		88	8 (3.8-14)	0.02664
	Education2	398	6 (2-13.8)		360	7 (3-14)	0.2617
	Education3	359	6 (3-11)		392	6 (3-11)	0.3277
	Education4	181	6 (3-13)		197	7 (4-13)	0.1841
	Education5	160	6 (4-11.3)		157	7 (4-13)	0.3049
Diagnosis=1	Hypertension0	649	5 (2-11)		671	5 (2-11)	0.988
	Hypertension1	306	5 (2-14)		305	5 (2-12)	0.426
Diagnosis=2	Hypertension0	62	8 (5.3-12)		66	7 (4-12.5)	0.5481
	Hypertension1	37	8 (6-11)		32	9 (6-14.3)	0.6137
Diagnosis=3	Hypertension0	178	8 (5-12)		159	7 (5-11)	0.487
	Hypertension1	66	8 (6-15.5)		80	10 (6-14)	0.264
Diagnosis=4	Hypertension0	18	7 (5-8.8)		16	7.5 (6-11.3)	0.1633
	Hypertension1	12	8.5 (7-11)		9	7 (6-9)	0.2079
Diagnosis=5	Hypertension0	44	9.5 (7-20.3)		40	8 (6-12)	0.06504
	Hypertension1	18	7 (6-10)		15	14 (6.5-24.5)	0.0607
Diagnosis=6	Hypertension0	56	11 (7-18)		52	8 (6-13)	0.108
	Hypertension1	32	9 (6-14)		33	10 (7-18)	0.2891
Diagnosis=1	Diabetes0	821	5 (2-12)		854	5 (2-11)	0.3379
	Diabetes1	134	4 (2-10)		122	5 (2-11.8)	0.2101
Diagnosis=2	Diabetes0	83	8 (6-12)		89	7 (5-14)	0.5541
	Diabetes1	16	8 (4-10.8)		9	9 (6-11)	0.5861
Diagnosis=3	Diabetes0	217	8 (5-13)		213	7 (5-13)	0.6901
	Diabetes1	27	10 (6-14)		26	7 (4.5-11)	0.4341
Diagnosis=4	Diabetes0	26	7 (5.3-10)		23	7 (6-10)	0.6106
	Diabetes1	4	7.5 (5.8-10.3)		2	14 (11.5-16.5)	NA
Diagnosis=5	Diabetes0	56	9 (6-18.3)		48	9 (6-13.3)	0.4331
	Diabetes1	6	8 (4.8-10.5)		7	8 (5.5-19)	0.4465
Diagnosis=6	Diabetes0	78	10 (7-18)		75	8 (6-15)	0.1407
	Diabetes1	10	9.5 (6.5-16.3)		10	14 (11.3-23.8)	0.1206
Diagnosis=1	Smoking0	525	5 (2-13)		555	5 (3-11)	0.1799
	Smoking1	430	4 (2-10)		421	4 (2-11)	0.4237
Diagnosis=2	Smoking0	74	8 (6-13)		72	7 (5-13.3)	0.6006
	Smoking1	25	8 (7-9)		26	7.5 (5.3-15)	0.5555
Diagnosis=3	Smoking0	185	7 (5-13)		193	7 (5-12)	0.519
	Smoking1	59	9 (6-14)		46	7.5 (5.3-13.8)	0.4239
Diagnosis=4	Smoking0	23	8 (6-10.5)		15	7 (6.5-9.5)	0.548
	Smoking1	7	7 (5-7)		10	7 (6-10)	0.4245
Diagnosis=5	Smoking0	40	10 (7-19.3)		43	10 (6.5-15)	0.5032
	Smoking1	22	7 (5.3-10.8)		12	7 (6-10.3)	0.6874
Diagnosis=6	Smoking0	53	10 (7-17)		45	7 (6-13)	0.0494
	Smoking1	35	10 (7.5-18)		40	12 (7.8-18.3)	0.3717
Diagnosis=1	Drinking0	553	5 (2-11)		576	5 (2-11)	0.8953
	Drinking1	402	5 (2-12)		400	4 (2-11)	0.3809
Diagnosis=2	Drinking0	75	8 (6-13)		66	7 (5-12.8)	0.9067
	Drinking1	24	7 (4-9.3)		32	9 (5-15)	0.158
Diagnosis=3	Drinking0	172	8 (5-13)		173	7 (5-11)	0.6469
	Drinking1	72	8 (5.8-13.3)		66	8.5 (6-14)	0.6247
Diagnosis=4	Drinking0	23	8 (6.5-11)		13	8 (7-10)	0.5098
	Drinking1	7	5 (5-7)		12	6.5 (6-10)	0.1043
Diagnosis=5	Drinking0	38	9.5 (6-18.8)		41	9 (6-15)	0.4571
	Drinking1	24	7.5 (6.8-17)		14	8.5 (6-13.5)	0.9949
Diagnosis=6	Drinking0	56	9 (6-14.3)		60	8 (6-15)	0.8927
	Drinking1	32	13 (9-19.5)		25	10 (7-17)	0.2671
Diagnosis=1	District0	346	5 (2-11)		314	4 (2-9)	0.204
	District1	609	5 (2-12)		662	5 (2-12)	0.9755
Diagnosis=2	District0	30	8 (7-12.8)		30	8 (6-15.8)	0.4156
	District1	69	8 (5-11)		68	7 (5-12)	0.6364
Diagnosis=3	District0	73	10 (6-14)		64	7 (5-13)	0.2202
	District1	171	7 (5-12)		175	8 (5-12)	0.5534
Diagnosis=4	District0	5	9 (8-11)		6	10 (7.8-11.5)	0.4171
	District1	25	7 (5-10)		19	7 (6-8.5)	0.857
Diagnosis=5	District0	24	8.5 (7-20.3)		14	7.5 (6-10)	0.04475
	District1	38	9 (6-16.5)		41	10 (6-21)	0.7065
Diagnosis=6	District0	31	9 (6.5-15.5)		24	8 (6.8-12.3)	0.4593
	District1	57	11 (7-18)		61	9 (6-15)	0.5158
Diagnosis=1	Education1	81	9 (4-20)		63	5 (3-13)	0.004898
	Education2	346	4 (2-10)		315	5 (2-10)	0.1545
	Education3	290	4 (2-10)		341	4 (2-10)	0.3198
	Education4	140	5 (2-12)		153	5 (3-11)	0.8747
	Education5	98	6 (3-11)		104	6 (3-12)	0.5981
Diagnosis=2	Education1	9	11 (9-17)		13	12 (6-14)	0.3986
	Education2	36	8 (6-12.3)		35	9 (7-15)	0.09253
	Education3	19	7 (4.5-9)		28	6 (3-10.8)	0.4318
	Education4	17	8 (6-14)		10	5 (4-8)	0.1535
	Education5	18	7 (5.3-12.8)		12	7 (5.8-8.8)	0.2098
Diagnosis=3	Education1	24	9.5 (6-14)		23	10 (6.5-13)	0.8711
	Education2	63	10 (5-15.5)		69	9 (6-13)	0.723
	Education3	63	8 (6-12)		66	7 (5-10)	0.2582
	Education4	39	7 (4.5-11)		39	7 (5-11.5)	0.5206
	Education5	55	7 (4-10.5)		42	7 (5-13.8)	0.7807
Diagnosis=4	Education1	6	10 (7.5-11)		2	9 (8.5-9.5)	NA
	Education2	7	7 (6-9.5)		4	8 (6.8-9.3)	0.9282
	Education3	10	7 (5.3-8.8)		8	7.5 (6-10.5)	0.3257
	Education4	6	6.5 (5.3-10.8)		5	7 (6-11)	0.6998
	Education5	1	5 (5-5)		6	6.5 (4.5-7.8)	NA
Diagnosis=5	Education1	5	15 (8-18)		6	6.5 (6-8.5)	0.1271
	Education2	29	8 (6-21)		11	8 (5.5-13)	0.241
	Education3	14	7 (6-9)		19	10 (7-14)	0.5659
	Education4	6	16.5 (11.5-28.3)		6	10.5 (5.8-20.5)	0.2737
	Education5	8	8.5 (7-10.3)		13	12 (7-22)	0.1046
Diagnosis=6	Education1	6	8 (4.3-11.8)		7	10 (6-16)	0.617
	Education2	28	9.5 (7-18)		21	13 (8-19)	0.871
	Education3	30	9 (7-13.8)		20	8 (4-12)	0.08717
	Education4	11	9 (5.5-17.5)		21	8 (7-15)	0.7287
	Education5	13	14 (10-18)		16	10.5 (3.8-16)	0.3931
Hypertension=0	Diabetes0	923	6 (3-12)		942	6 (3-11)	0.4283
	Diabetes1	84	6 (2-11)		62	6.5 (4-11.8)	0.1123
Hypertension=1	Diabetes0	358	7 (3-14)		360	7 (3-14)	0.4553
	Diabetes1	113	5 (2-13)		114	7 (3-14)	0.6351
Hypertension=0	Smoking0	635	6 (4-12)		648	6 (3-11)	0.5645
	Smoking1	372	5 (3-12)		356	5.5 (2.8-11)	0.8794
Hypertension=1	Smoking0	265	7 (5-15)		275	7 (4-14)	0.1773
	Smoking1	206	4.5 (2-11)		199	7 (2-14)	0.3812
Hypertension=0	Drinking0	644	6 (3-12)		649	6 (3-11)	0.9354
	Drinking1	363	6 (3-13)		355	6 (3-11.5)	0.4569
Hypertension=1	Drinking0	273	7 (4-13)		280	7 (4-14)	0.8318
	Drinking1	198	7 (2-13.8)		194	7 (3-14)	0.4176
Hypertension=0	District0	367	6 (3-12)		339	6 (3-11)	0.1848
	District1	640	6 (3-12)		665	6 (3-11)	0.7635
Hypertension=1	District0	142	7 (3-14)		113	7 (3-11)	0.1098
	District1	329	6 (3-13)		361	7 (3-14)	0.9062
Hypertension=0	Education1	83	8 (4-19)		68	6 (3-13)	0.07023
	Education2	306	6 (3-12)		295	6 (3-11)	0.3153
	Education3	311	6 (3-10)		339	6 (3-10)	0.6564
	Education4	153	6 (3-12)		164	6 (3-12)	0.665
	Education5	154	7 (4-11.8)		138	7 (4-11)	0.8867
Hypertension=1	Education1	48	11.5 (7-18)		46	8 (5-14)	0.03031
	Education2	203	6 (2-12)		160	8 (3-15)	0.3441
	Education3	115	6 (3-11)		143	6 (2-11)	0.1269
	Education4	66	7 (3-13.8)		70	7 (5-12.8)	0.5984
	Education5	39	7 (3.5-14)		55	10 (4.5-15)	0.5453
Diabetes=0	Smoking0	796	7 (4-14)		820	7 (4-12)	0.1032
	Smoking1	485	5 (2-12)		482	6 (2-12)	0.722
Diabetes=1	Smoking0	104	6 (3-11)		103	7 (4-12)	0.2777
	Smoking1	93	4 (2-13)		73	7 (2-14)	0.3644
Diabetes=0	Drinking0	798	7 (4-13)		814	6 (3-12)	0.5646
	Drinking1	483	6 (3-13)		488	6 (3-13)	0.3188
Diabetes=1	Drinking0	119	5 (3-10)		115	7 (4-14)	0.02441
	Drinking1	78	7.5 (2-14)		61	6 (2-13)	0.6562
Diabetes=0	District0	456	6 (3-13)		406	6 (3-11)	0.1327
	District1	825	7 (3-12)		896	6.5 (3-12)	0.9582
Diabetes=1	District0	53	6 (3-11)		46	6.5 (3-15.5)	0.1557
	District1	144	5 (2-13)		130	7 (3-12.8)	0.4135
Diabetes=0	Education1	110	11 (5-19)		104	7 (4-14)	0.02515
	Education2	428	6 (3-13)		388	6 (3-13)	0.4793
	Education3	380	6 (3-11)		439	6 (3-11)	0.1235
	Education4	189	6 (3-13)		201	7 (4-12)	0.7285
	Education5	174	7 (4-12)		170	7 (4-13)	0.5676
Diabetes=1	Education1	21	9 (4-14)		10	5.5 (2.3-6)	0.04457
	Education2	81	5 (2-11)		67	8 (3-17.5)	0.05651
	Education3	46	3.5 (2-8.8)		43	5 (2-8.5)	0.4017
	Education4	30	7 (4.3-13)		33	7 (4-13)	0.6866
	Education5	19	6 (4-14.5)		23	8 (3-12.5)	0.7213
Smoking=0	Drinking0	771	7 (4-13)		790	7 (4-11.8)	0.5424
	Drinking1	129	7 (4-15)		133	7 (4-14)	0.1167
Smoking=1	Drinking0	146	5 (2-9)		139	6 (3-14)	0.0461
	Drinking1	432	5 (2-12)		416	6 (2-11)	0.7521
Smoking=0	District0	301	7 (4-14)		269	6 (3-12)	0.03077
	District1	599	7 (4-13)		654	7 (4-12)	0.7295
Smoking=1	District0	208	5 (2-11)		183	5 (3-9)	0.597
	District1	370	5 (2-12)		372	6 (2-13.3)	0.3289
Smoking=0	Education1	105	9 (6-18)		93	7 (4-14)	0.03481
	Education2	276	6 (3-14)		276	7 (4-13.3)	0.6238
	Education3	233	6 (3-10)		272	6 (3-10)	0.2462
	Education4	134	6 (4-13)		144	6 (4-11.3)	0.5325
	Education5	152	7 (4-13)		138	7 (4-12)	0.9602
Smoking=1	Education1	26	14 (4-22.3)		21	6 (3-9)	0.176
	Education2	233	5 (2-11)		179	5 (2-10.5)	0.2151
	Education3	193	5 (3-10)		210	5 (2-11)	0.5515
	Education4	85	5 (2-13)		90	7 (4-13.8)	0.5797
	Education5	41	5 (3-9)		55	6 (2.5-14)	0.1734
Drinking=0	District0	307	7 (3.5-14)		292	6 (3-11.3)	0.1816
	District1	610	6 (3-12)		637	7 (4-12)	0.3556
Drinking=1	District0	202	6 (2-12)		160	5.5 (3-9)	0.5532
	District1	359	6 (3-14)		389	6 (3-14)	0.5623
Drinking=0	Education1	102	9 (5-18)		87	7 (4-13.5)	0.04049
	Education2	291	6 (3-13)		278	7 (4-14)	0.03263
	Education3	248	6 (3-10)		272	6 (3-10)	0.7494
	Education4	136	6 (3-12)		154	7 (4-11)	0.9127
	Education5	140	7 (4-12)		138	7 (4-12)	0.9038
Drinking=1	Education1	29	12 (5-19)		27	6 (3.5-14.5)	0.1411
	Education2	218	5 (2-12)		177	5 (2-10)	0.6989
	Education3	178	6 (3-13)		210	6 (2-12)	0.1398
	Education4	83	7 (3-13.5)		80	7 (4-14)	0.8754
	Education5	53	6 (3-11)		55	7 (3-14)	0.3166
District=0	Education1	58	7 (5-18)		55	6 (3-13.5)	0.09578
	Education2	228	6 (3-13)		167	6 (3-11.5)	0.7787
	Education3	169	6 (3-11)		164	5 (2-9)	0.04722
	Education4	34	6 (2.3-13.8)		54	7 (3-11)	0.9571
	Education5	20	6.5 (3-11.5)		12	8.5 (6.3-13.8)	0.2131
District=1	Education1	73	11 (7-19)		59	8 (4-13.5)	0.01394
	Education2	281	5 (2-12)		288	7 (3-13.3)	0.1473
	Education3	257	6 (3-10)		318	6 (3-11)	0.8822
	Education4	185	6 (3-13)		180	7 (4-12)	0.9478
	Education5	173	7 (4-12)		181	7 (4-13)	0.7029
Definition of subgroup labels: Sex: 1 [Male], 2 [Female]; Age: 1 [<51years], 2 [51-59years], 3 [60-67years], 4 [≥68years]; BMI 1 [<18.5], 2 [18.5-24], 3 [24-28], 4 [≥28]; Length of Stay (LOS): 1 [1-6 days], 2 [7-13 days], 3 [14-29 days], 4 [≥30 days]; Surgery: 0 [No], 1 [Yes]; Diagnosis: 1 [Benign tumor], 2 [Malignant tumor], 3 [Inflammation], 4 [Hernia], 5 [Intestinal obstruction], 6 [Others]; H…
p values are determined by T-test or Wilcoxon Rank Sum test.
